# Supplementary material for: High spin iron(ii) complexes based on imidazolyl- and 1,2,3-triazolyl-thione ligands and NCE (E = S, Se or BH3) co-ligands: effect of the S-functional group on the structural and magnetic properties
Source: Royal Society of Chemistry journal article supplement (doi:10.1039/d2nj01989b), 2022-01-01
Supplement: d2nj01989b1.pdf [file d2nj01989b1.pdf]

## Supplementary material for

# High spin iron(II) complexes based on imidazolyl- and 1,2,3-triazolyl-thione ligands and NCE (E = S, Se or BH<sub>3</sub>) co-ligands: effect of the S-functional group on the structural and magnetic properties

Diego Plaza-Lozano,<sup>a</sup> David Ramírez-Palma,<sup>a</sup> Alberto Vela,<sup>a</sup> and Juan Olguín\*<sup>a</sup>

<sup>a</sup> Departamento de Química, Centro de Investigación y de Estudios Avanzados del IPN (CINVESTAV),  
Avenida IPN 2508, Col. San Pedro Zacatenco, Ciudad de México 07360, México.

\*Corresponding author: J. Olguín (jolguin@cinvestav.mx)

|                                                                                                                                                                    |    |
|--------------------------------------------------------------------------------------------------------------------------------------------------------------------|----|
| 1. Spectroscopic characterisation.....                                                                                                                             | 2  |
| 1.1. Pyridotetrazole (A <sup>1</sup> ). .....                                                                                                                      | 2  |
| 1.2. 2-(4-Phenyl-1-(1 <i>H</i> -1,2,3-triazolyl))pyridine (A <sup>2</sup> ). .....                                                                                 | 3  |
| 1.3. 3-Methyl-4-phenyl-1-(2-pyridyl)-1 <i>H</i> -1,2,3-triazole trifluoromethanesulfonate (A <sup>3</sup> ). .....                                                 | 4  |
| 1.4. 3-Methyl-4-phenyl-1-(2-pyridyl)-1,2,3-triazolyl-5-thione (TrzPyS). .....                                                                                      | 5  |
| 1.5. Complex <i>trans</i> -[Fe <sup>II</sup> (Py) <sub>4</sub> (NCS) <sub>2</sub> ] (P <sup>1</sup> ). .....                                                       | 7  |
| 1.6. Complex <i>trans</i> -[Fe <sup>II</sup> (Py) <sub>4</sub> (NCSe) <sub>2</sub> ] (P <sup>2</sup> ). .....                                                      | 7  |
| 1.7. Complex <i>trans</i> -[Fe <sup>II</sup> (Py) <sub>4</sub> (NCBH <sub>3</sub> ) <sub>2</sub> ] (P <sup>3</sup> ). .....                                        | 8  |
| 1.8. Complex <i>trans</i> -[Fe <sup>II</sup> (ImPyS) <sub>2</sub> (NCS) <sub>2</sub> ] (1a). .....                                                                 | 8  |
| 1.9. Complex <i>trans</i> -[Fe <sup>II</sup> (ImPyS) <sub>2</sub> (NCSe) <sub>2</sub> ] (1b). .....                                                                | 9  |
| 1.10. Complex <i>trans</i> -[Fe <sup>II</sup> (ImPyS) <sub>2</sub> (NCBH <sub>3</sub> ) <sub>2</sub> ] (1c). .....                                                 | 10 |
| 1.11. Complex <i>trans</i> -[Fe <sup>II</sup> (TrzPyS) <sub>2</sub> (NCS) <sub>2</sub> ] (2a). .....                                                               | 12 |
| 1.12. Complex <i>trans</i> -[Fe <sup>II</sup> (TrzPyS) <sub>2</sub> (NCSe) <sub>2</sub> ] (2b). .....                                                              | 13 |
| 1.13. Complex <i>trans</i> -[Fe <sup>II</sup> (TrzPyS) <sub>2</sub> (NCBH <sub>3</sub> ) <sub>2</sub> ] (2c). .....                                                | 14 |
| 2. X-ray analysis. ....                                                                                                                                            | 15 |
| 2.2. Chemical structure of the literature complexes. <sup>[S3]</sup> .....                                                                                         | 20 |
| 2.3. Comparison of structural parameters with literature complexes of iron(II) in {N <sub>4</sub> S <sub>2</sub> }<br>coordination sphere. <sup>[S3-5]</sup> ..... | 21 |
| 2.4. Supramolecular analysis. ....                                                                                                                                 | 23 |
| 3. DFT Calculations .....                                                                                                                                          | 24 |
| 4. References. ....                                                                                                                                                | 52 |

## 1. Spectroscopic characterisation.

### 1.1. Pyridotetrazole (A<sup>1</sup>).

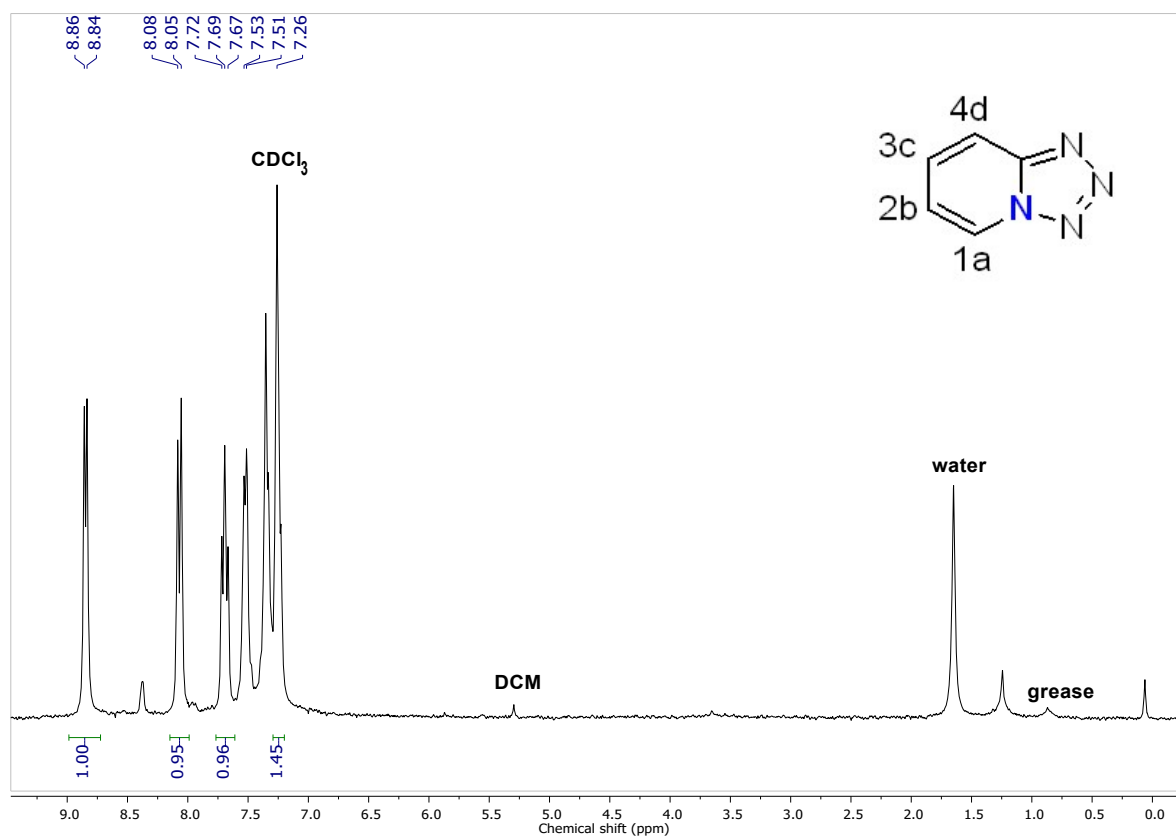

Figure S1. <sup>1</sup>H-NMR spectrum for (A<sup>1</sup>) in chloroform-*d*.

1.2.2-(4-Phenyl-1-(1H-1,2,3-triazolyl))pyridine (A<sup>2</sup>).

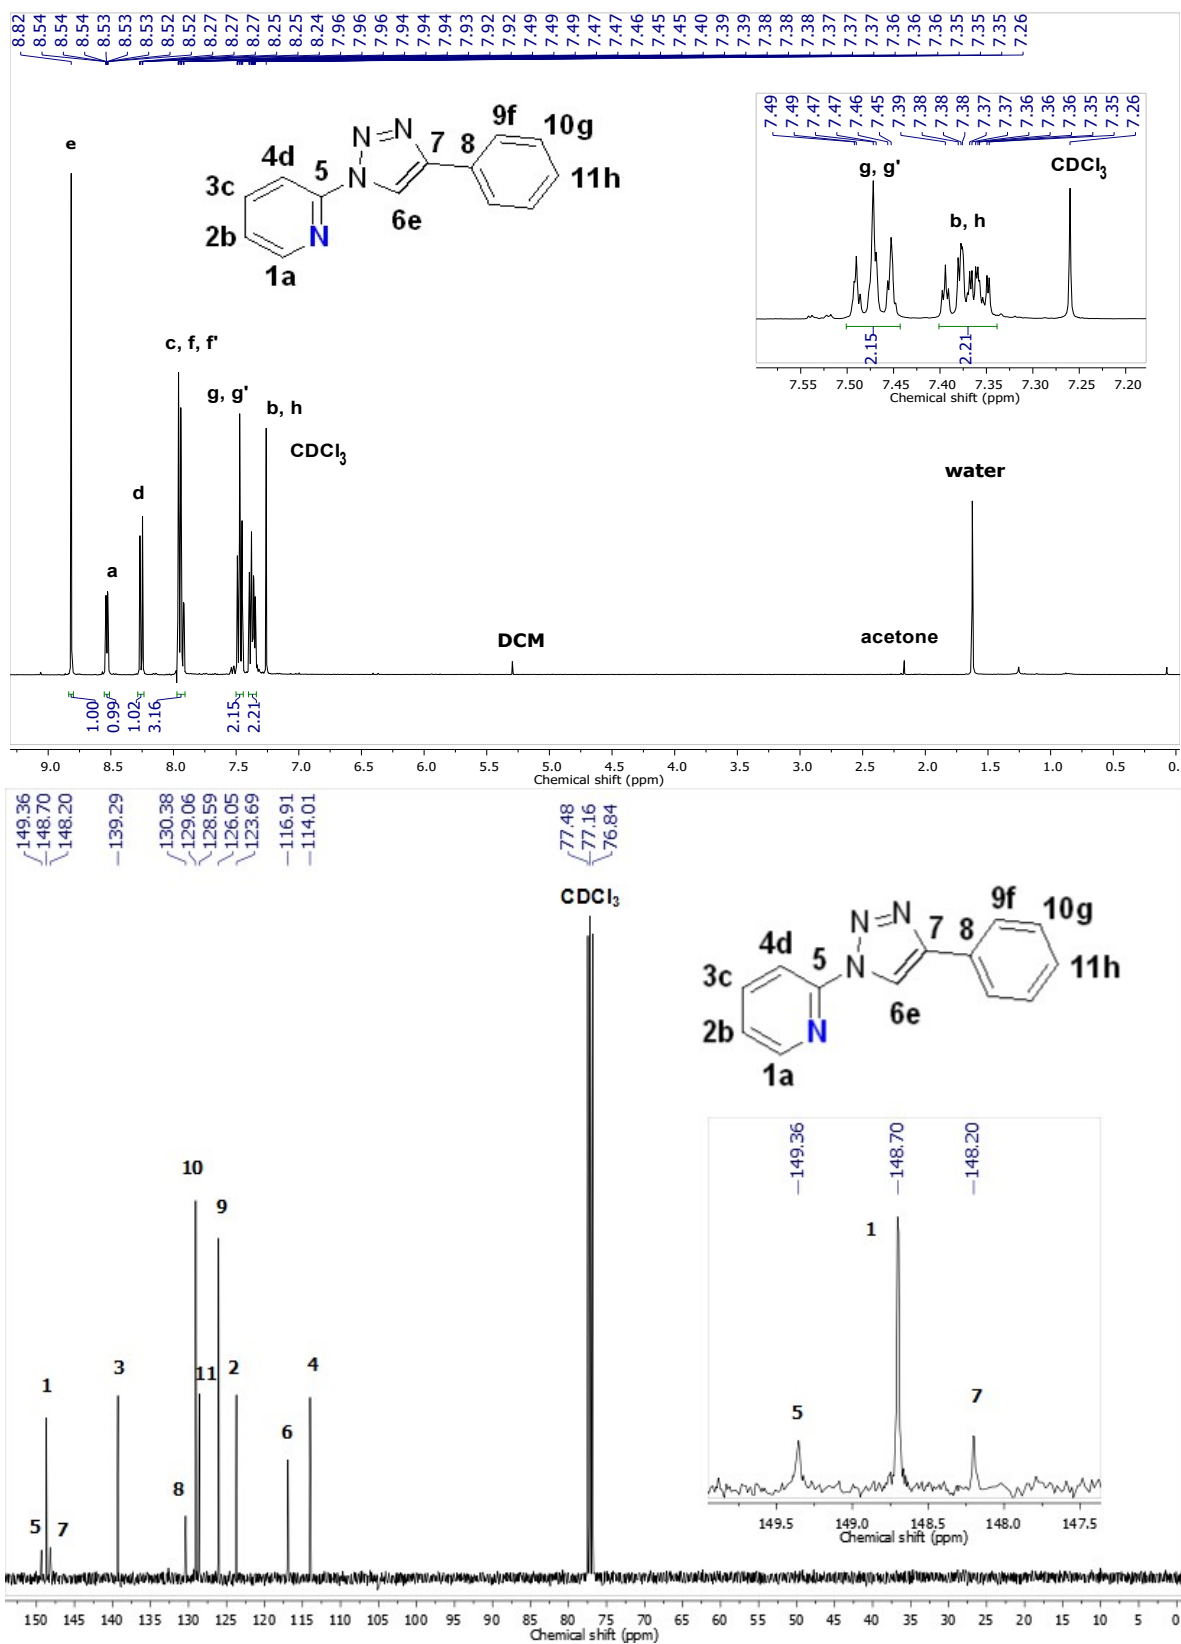

Figure S2. <sup>1</sup>H- (top) and <sup>13</sup>C{<sup>1</sup>H}-NMR (bottom) spectra for (A<sup>2</sup>) in chloroform-d<sub>3</sub>.

1.3. 3-Methyl-4-phenyl-1-(2-pyridyl)-1*H*-1,2,3-triazole trifluoromethanesulfonate (**A**<sup>3</sup>).

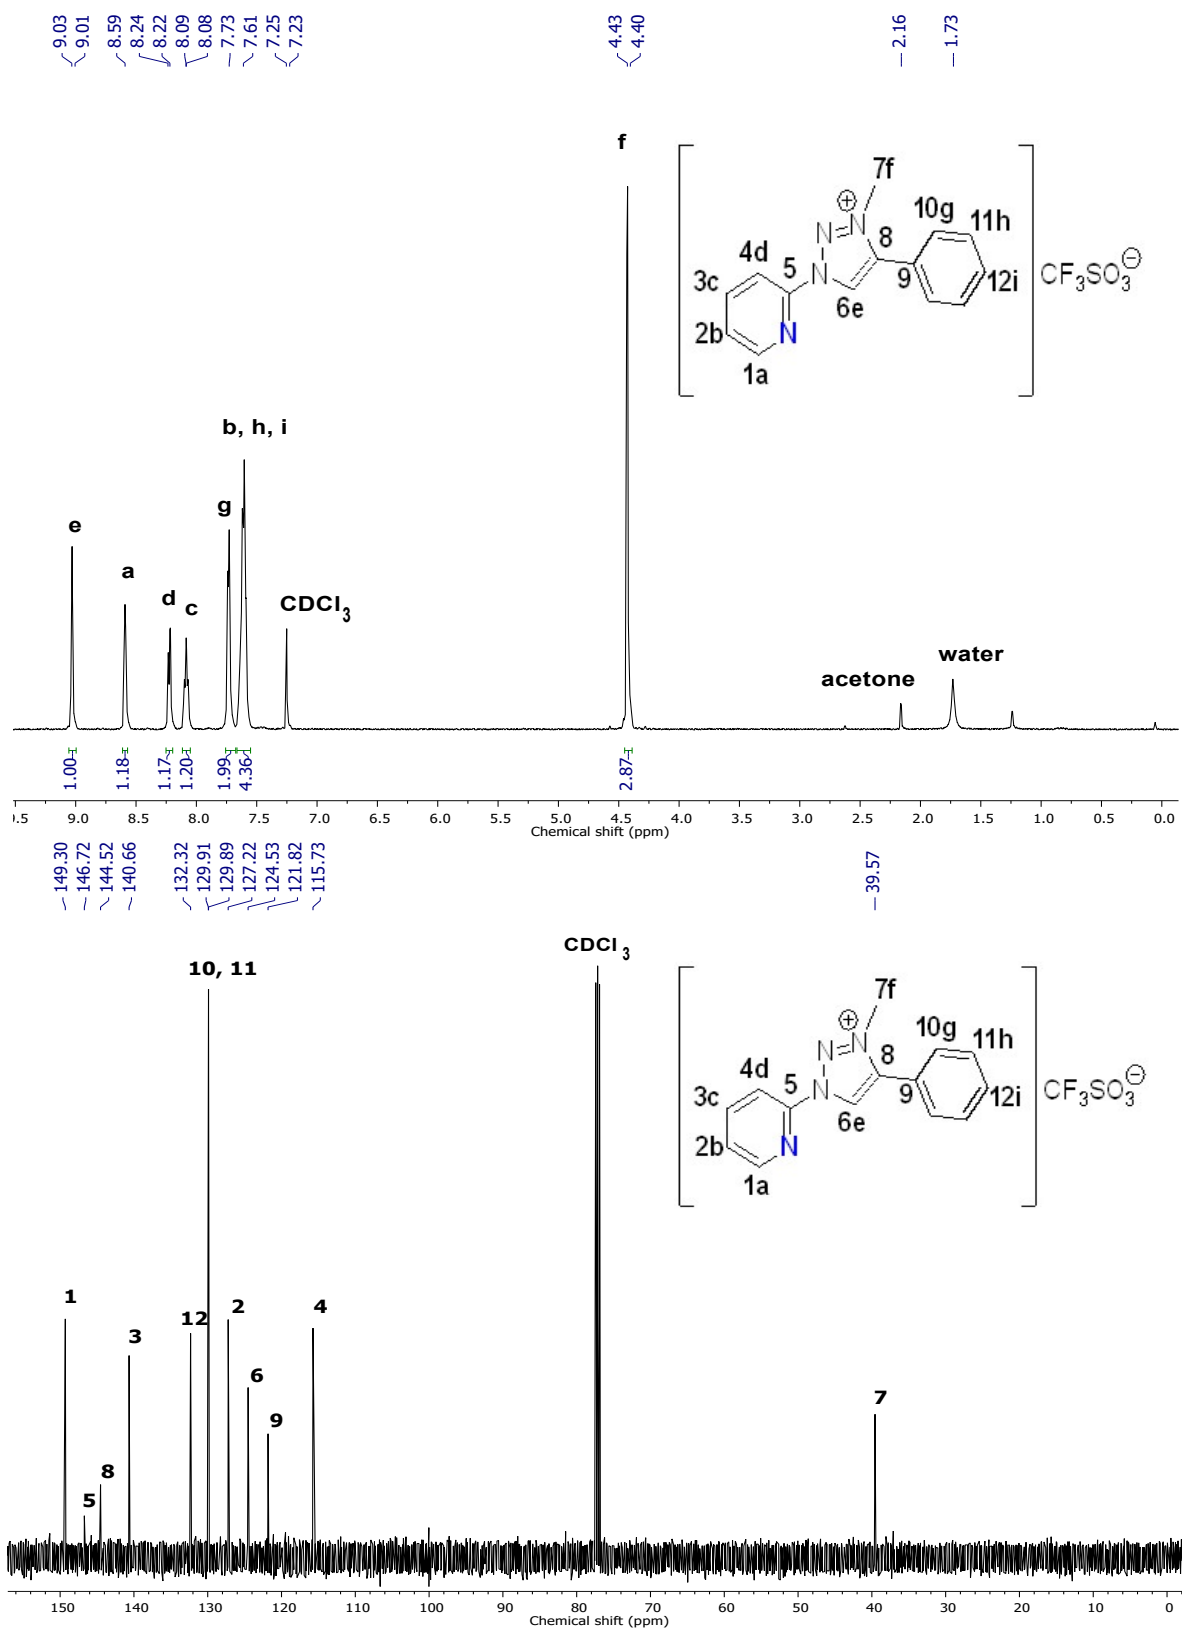

Figure S3. <sup>1</sup>H- (top) and <sup>13</sup>C{<sup>1</sup>H}-NMR (bottom) spectra for (**A**<sup>3</sup>) in chloroform-*d*.

### 1.4. 3-Methyl-4-phenyl-1-(2-pyridyl)-1,2,3-triazolyl-5-thione (TrzPyS).

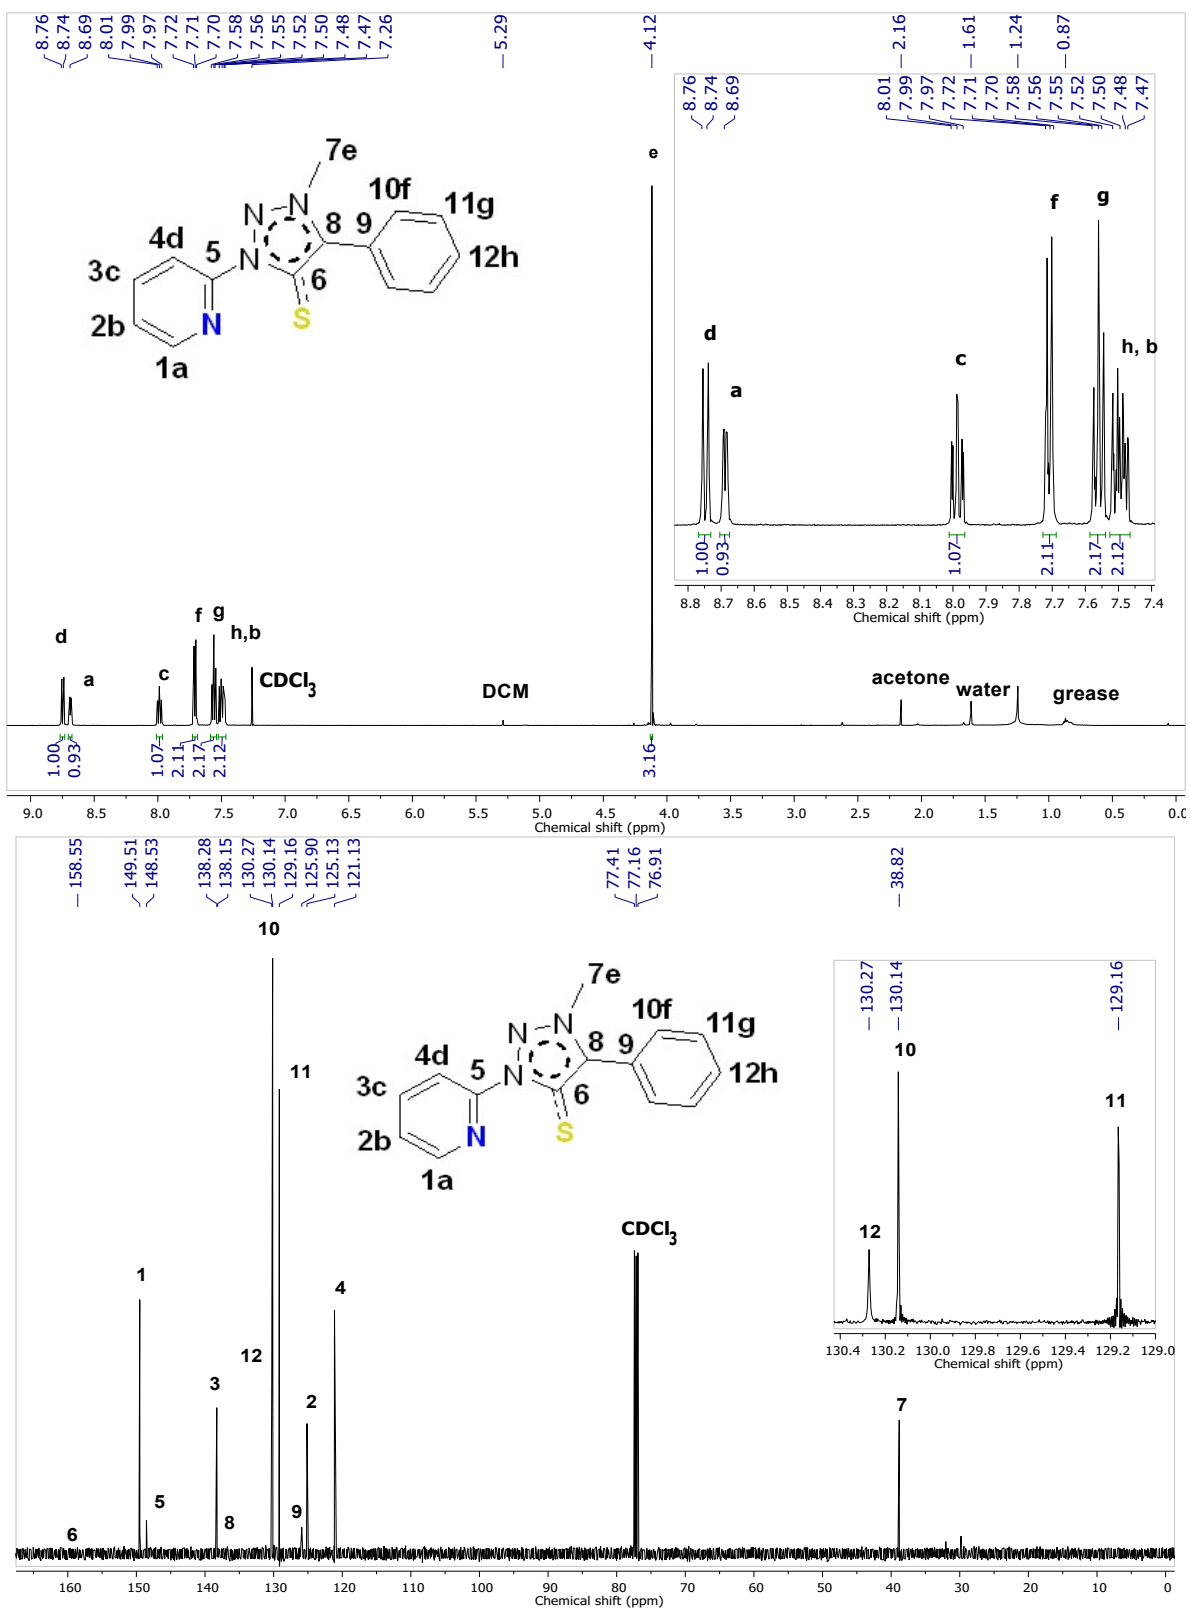

Figure S4. <sup>1</sup>H- (top) and <sup>13</sup>C{<sup>1</sup>H}-NMR (bottom) spectra (TrzPyS) in chloroform-*d*.

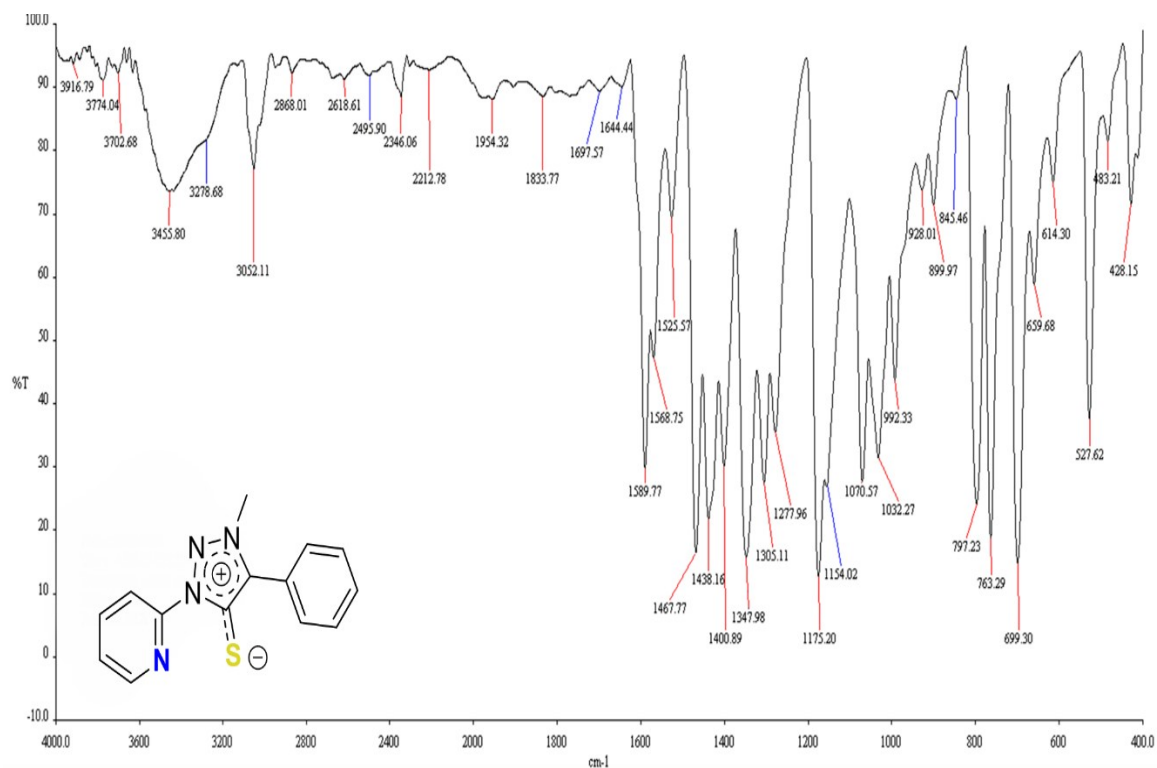

Figure S5. Infrared spectrum for (TrzPyS).

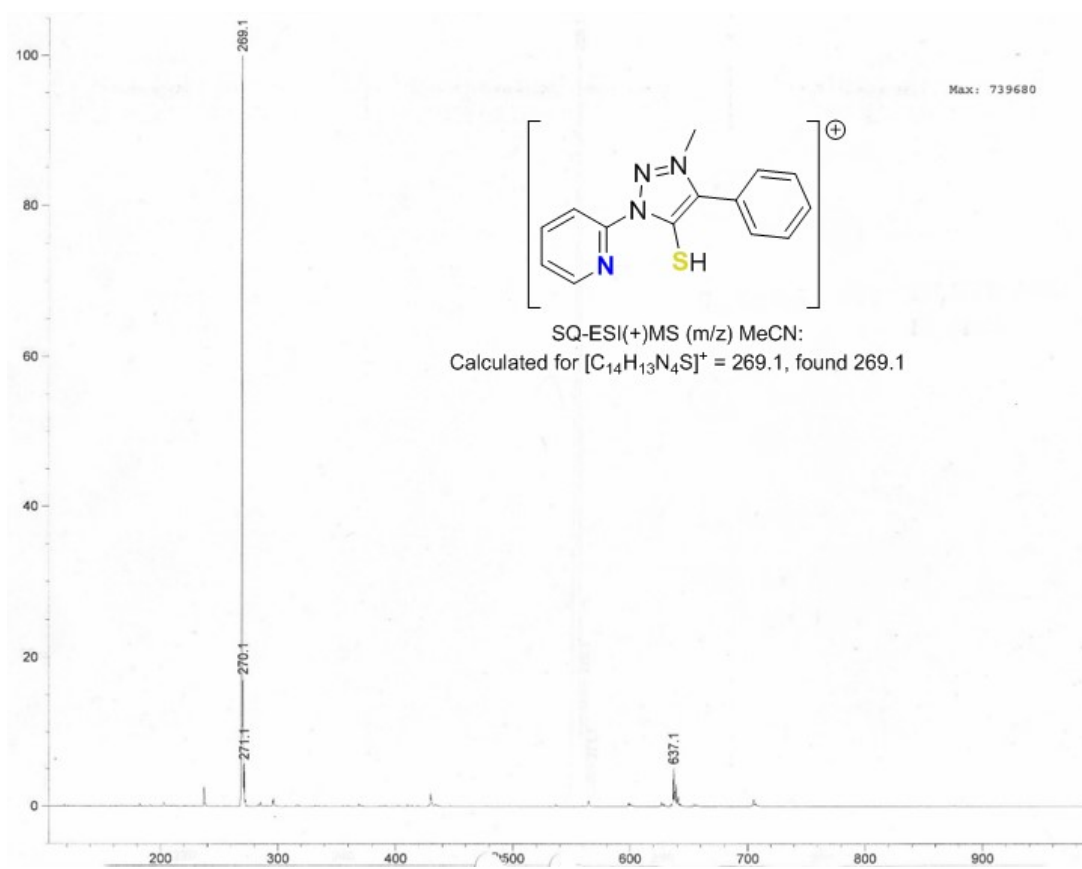

Figure S6. Mass spectrum for (TrzPyS).

### 1.5. Complex $trans\text{-}[\text{Fe}^{\text{II}}(\text{Py})_4(\text{NCS})_2]$ ( $\text{P}^1$ ).

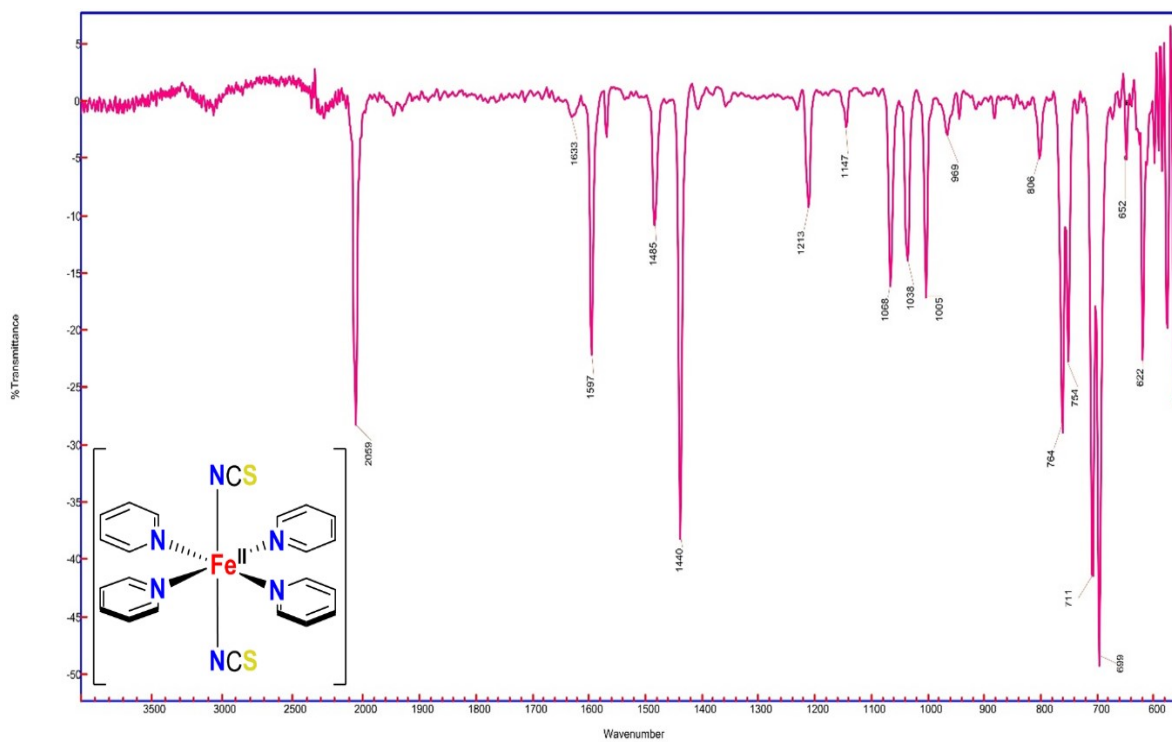

Figure S7. Infrared spectrum for ( $\text{P}^1$ ).

### 1.6. Complex $trans\text{-}[\text{Fe}^{\text{II}}(\text{Py})_4(\text{NCSe})_2]$ ( $\text{P}^2$ ).

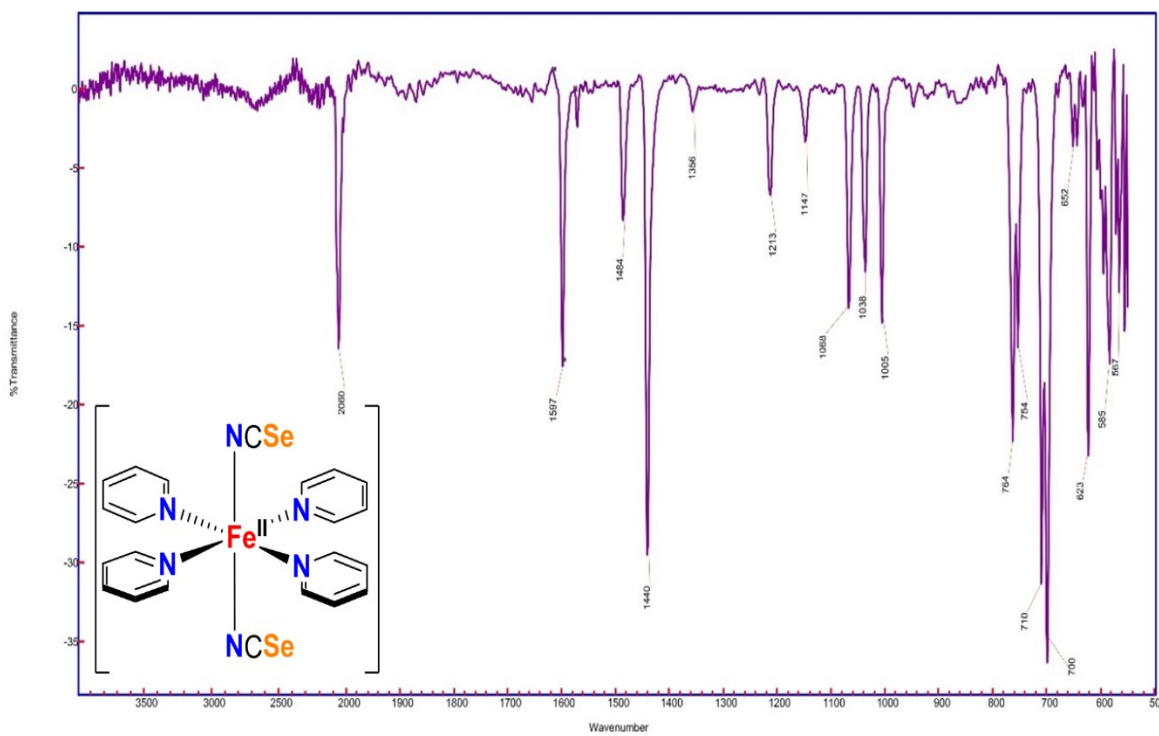

Figure S8. Infrared spectrum for ( $\text{P}^2$ ).

1.7. Complex  $trans-[Fe^{II}(Py)_4(NCBH_3)_2]$  ( $P^3$ ).

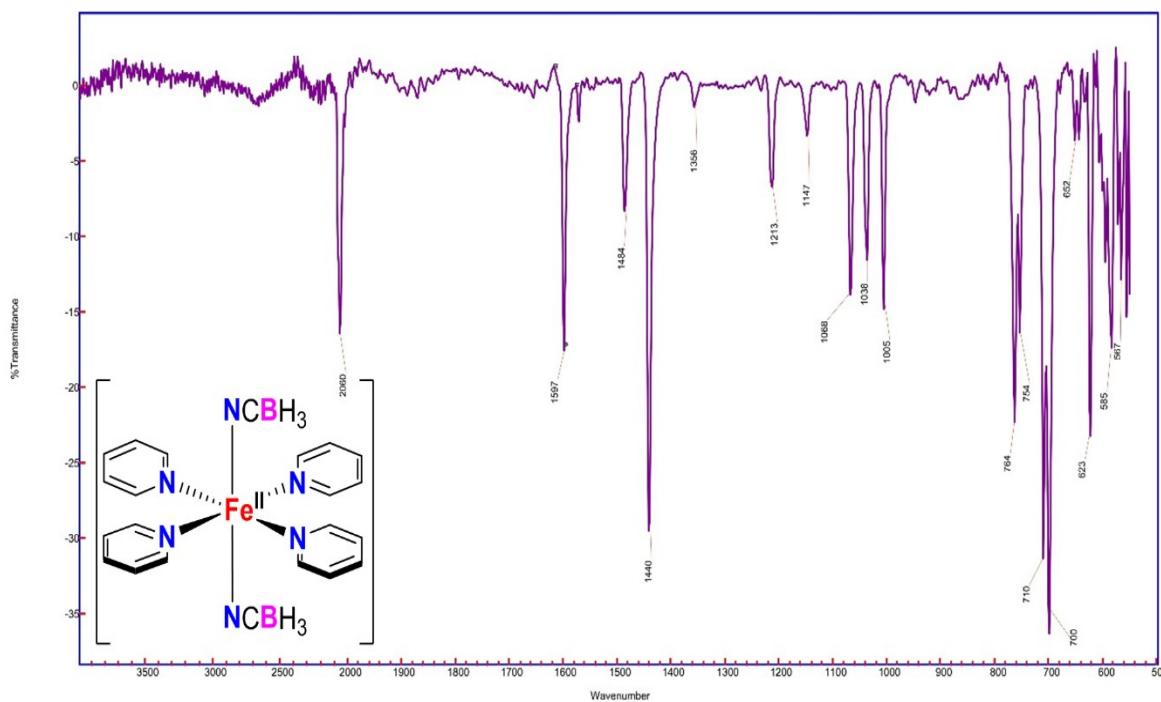

Figure S9. Infrared spectrum for ( $P^3$ ).

1.8. Complex  $trans-[Fe^{II}(ImPyS)_2(NCS)_2]$  ( $1a$ ).

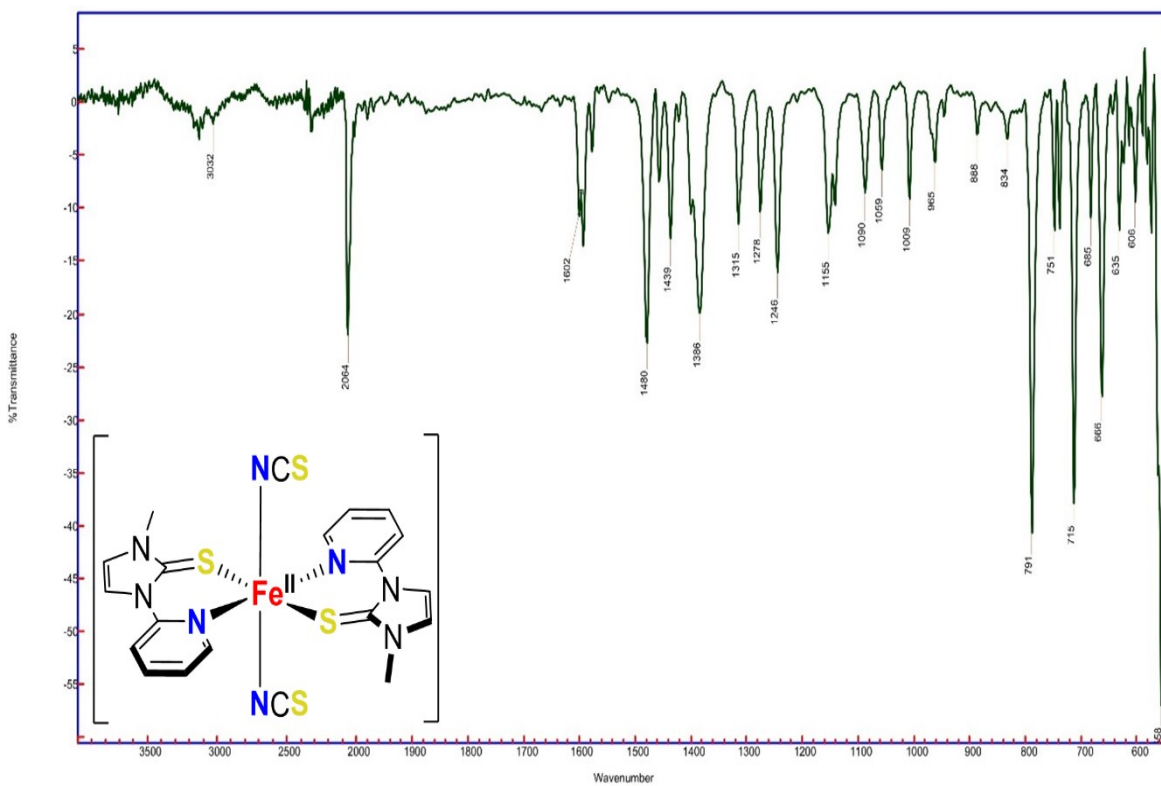

Figure S10. Infrared spectrum for ( $1a$ ).



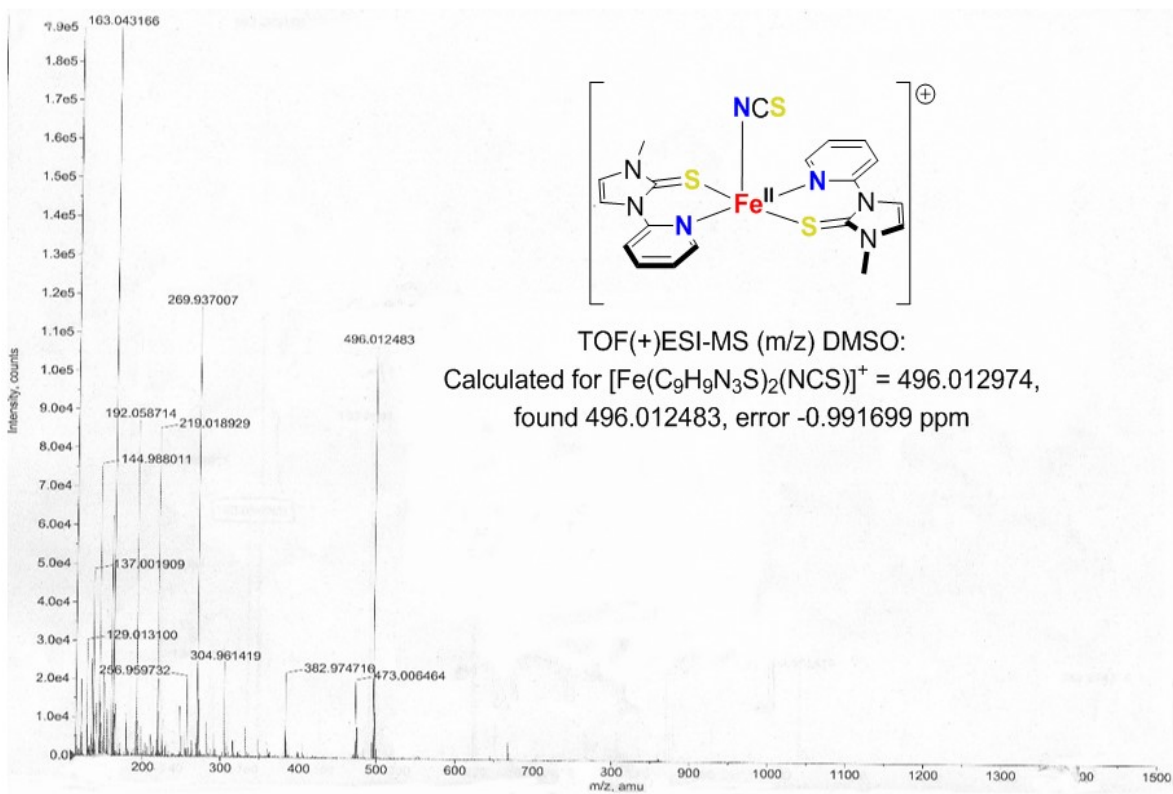

Figure S11. Mass spectrum for (1a).

1.9. Complex *trans*- $[\text{Fe}^{\text{II}}(\text{ImPyS})_2(\text{NCSe})_2]$  (1b).

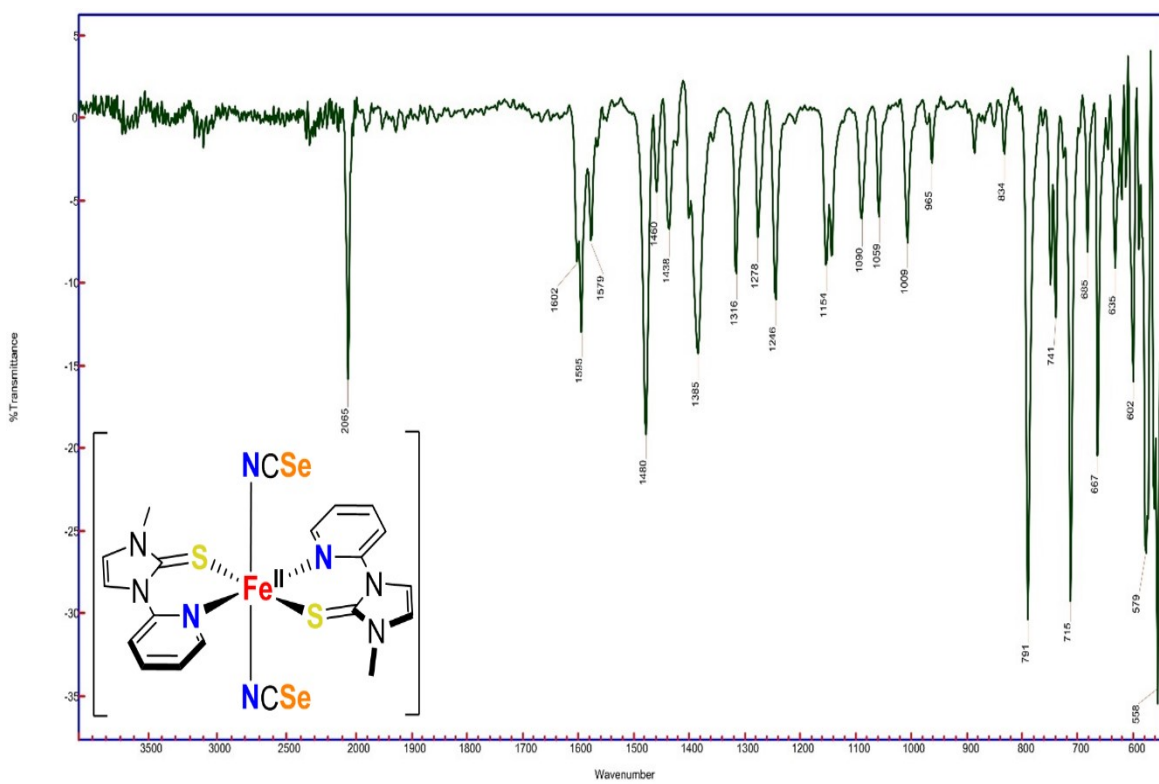

Figure S12. Infrared spectrum for (1b).

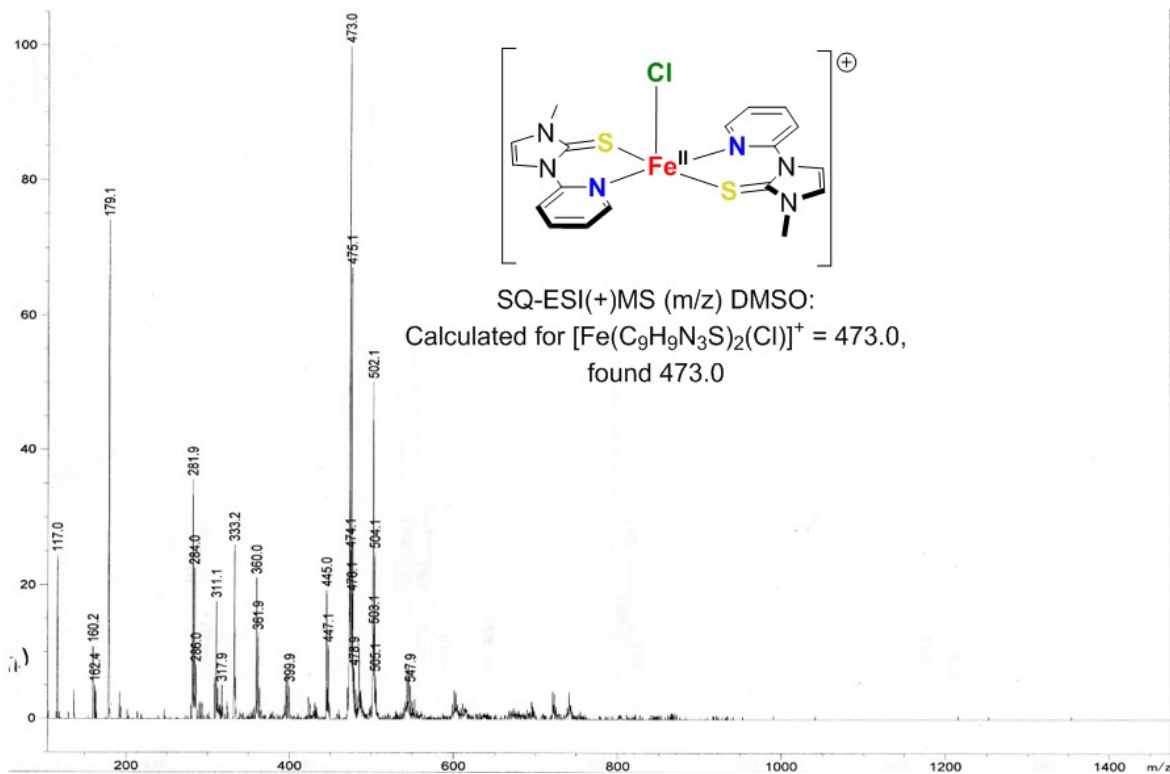

Figure S13. Mass spectrum for (1b).

1.10. Complex  $\text{trans-}[\text{Fe}^{\text{II}}(\text{ImPyS})_2(\text{NCBH}_3)_2]$  (1c).

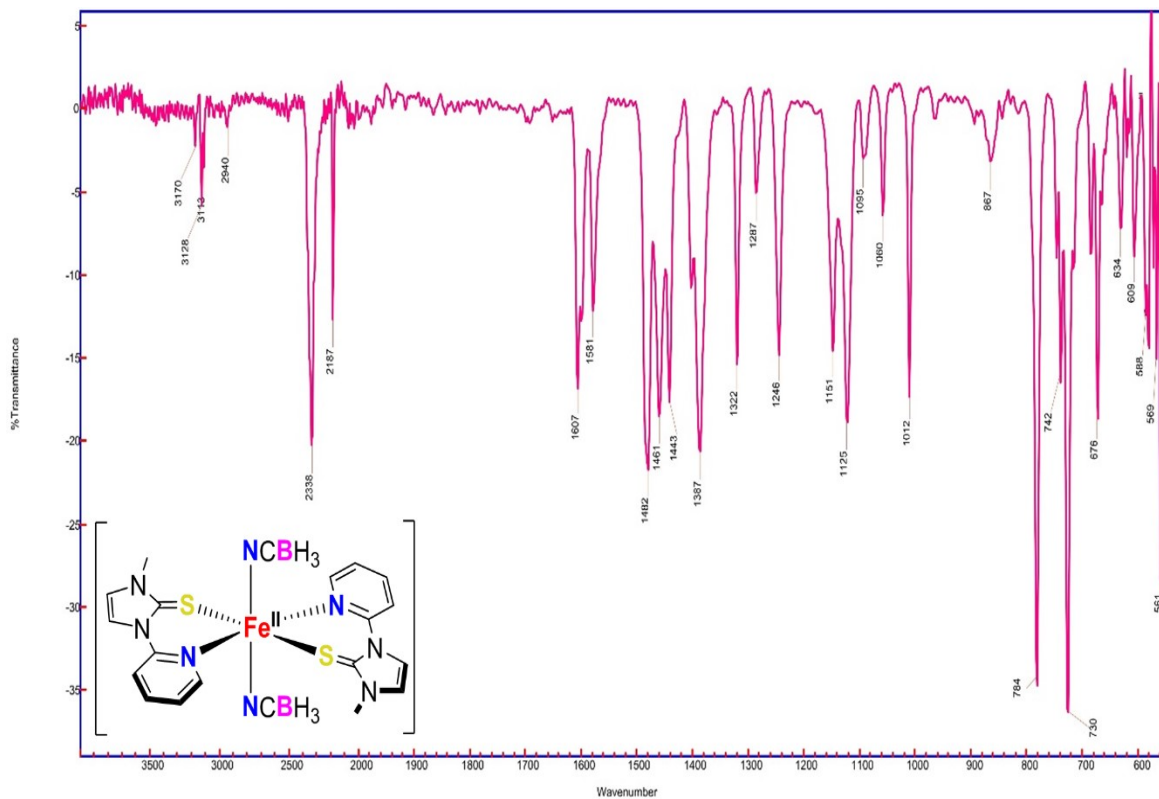

Figure S14. Infrared spectrum for (1c).

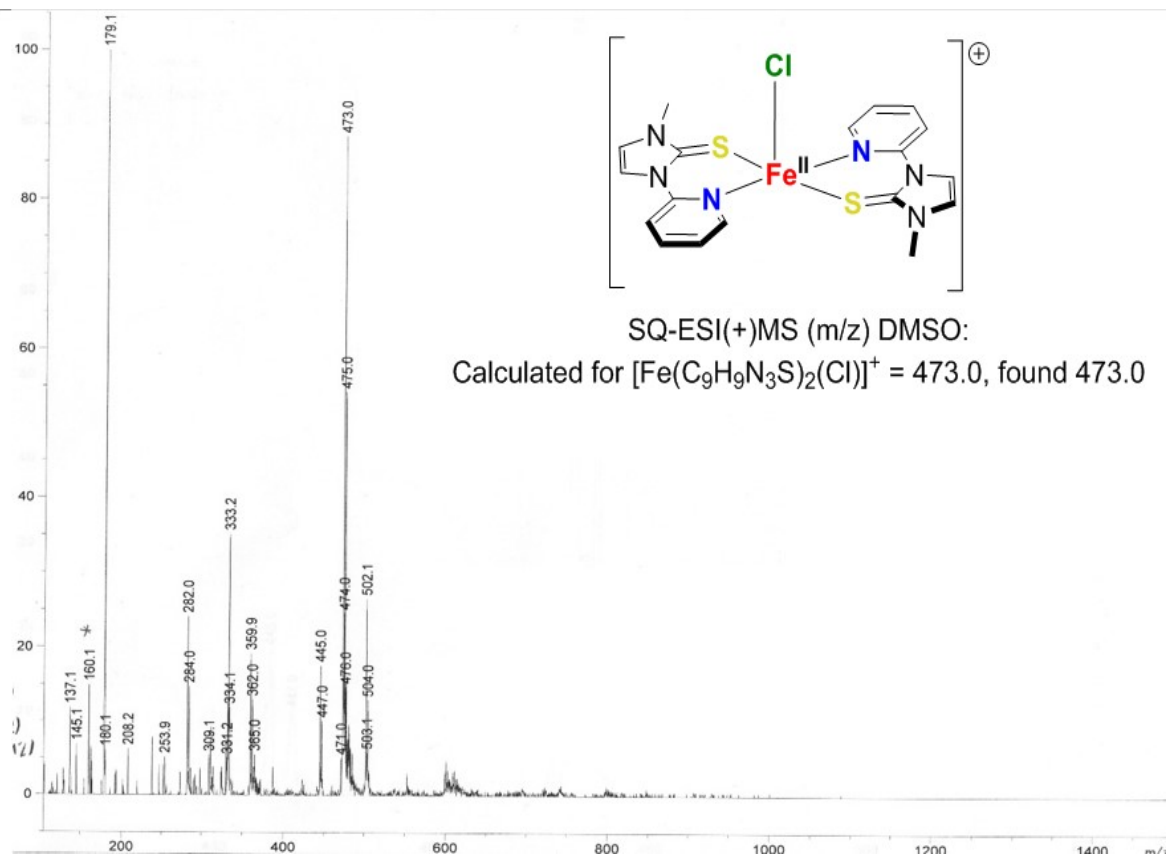

Figure S15. Mass spectrum for (1c).

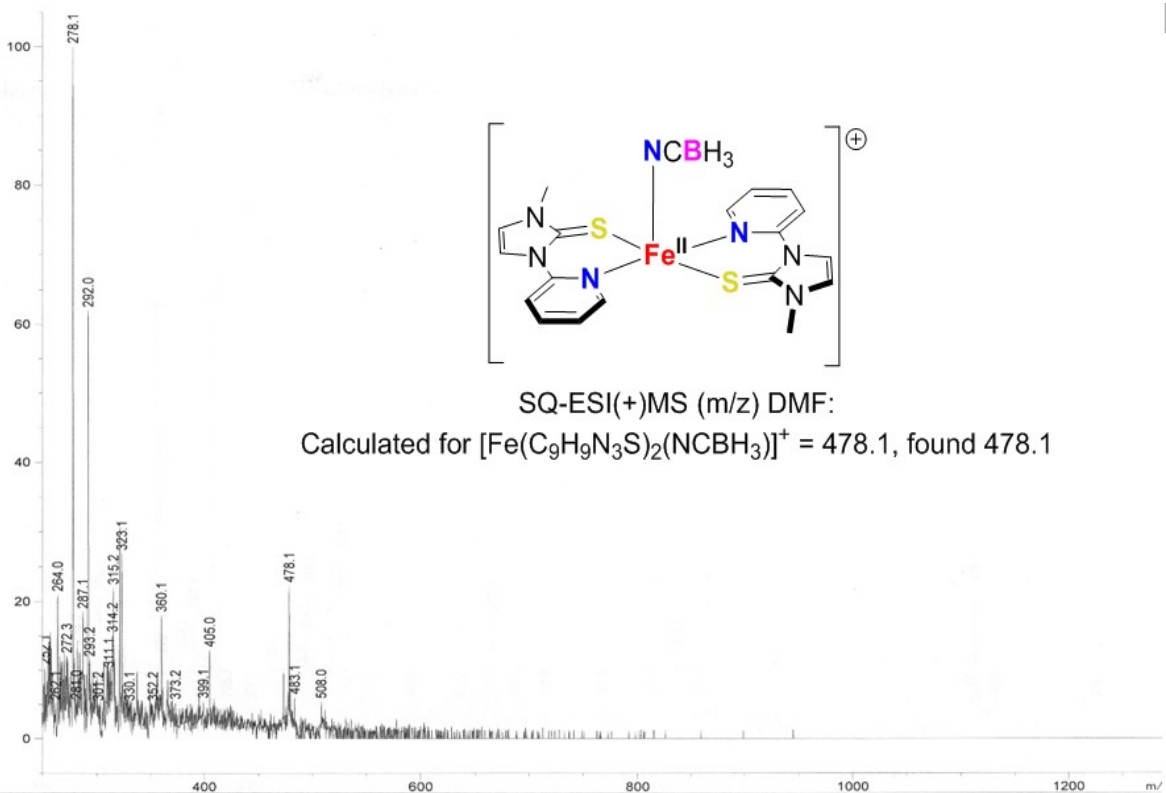

Figure S16. Mass spectrum for (1c).

1.11. Complex  $trans-[Fe^{II}(TrzPyS)_2(NCS)_2]$  (**2a**).

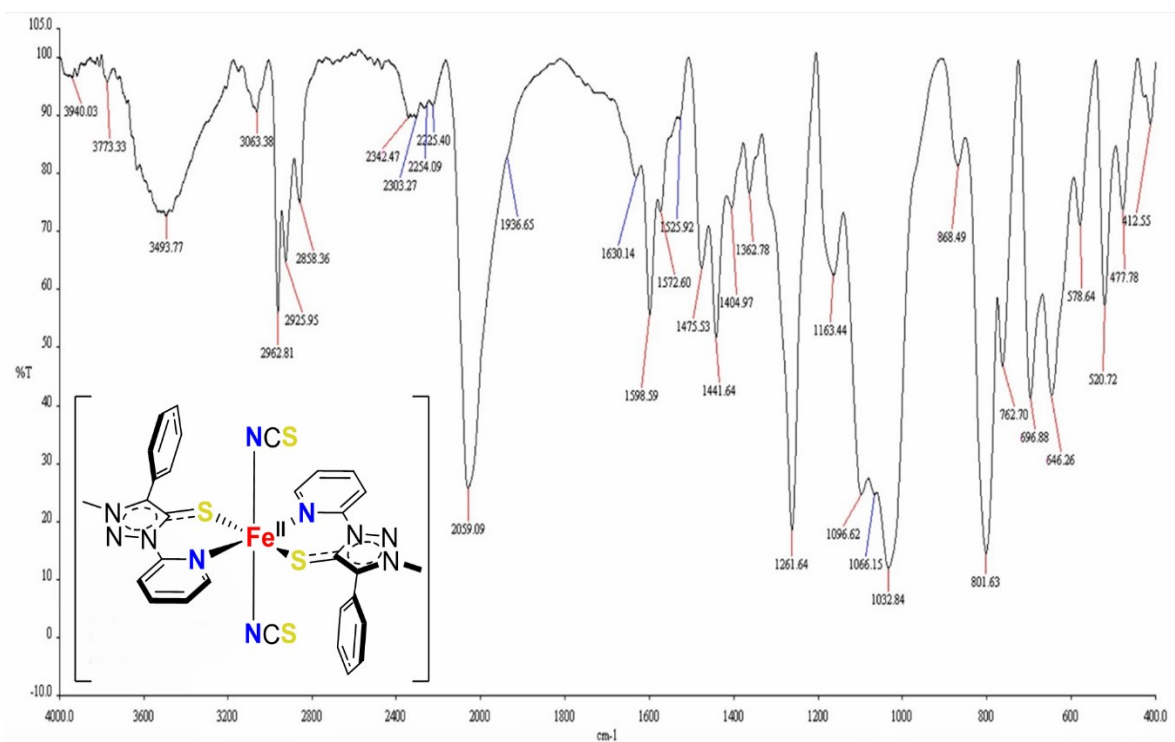

Figure S17. Infrared spectrum for (**2a**).

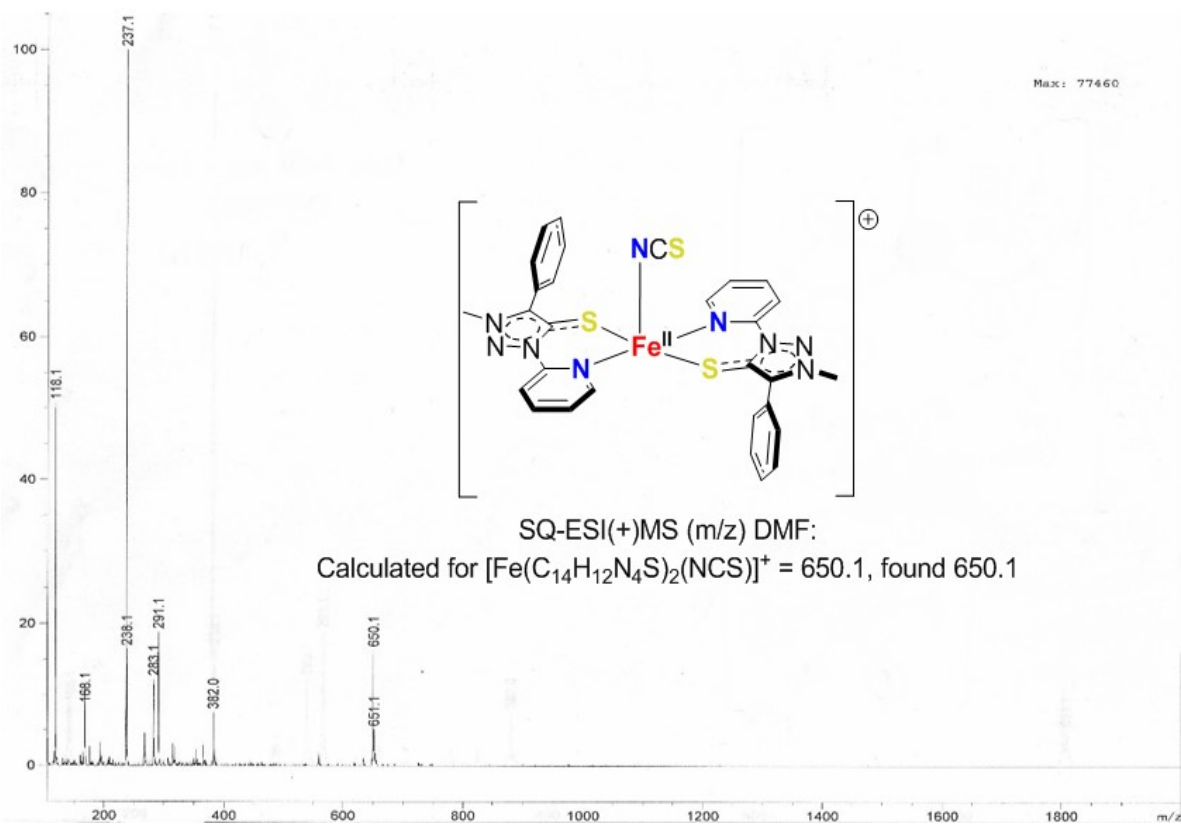

Figure S18. Mass spectrum for (**2a**).

1.12. Complex *trans*-[Fe<sup>II</sup>(TrzPyS)<sub>2</sub>(NCSe)<sub>2</sub>] (2b).

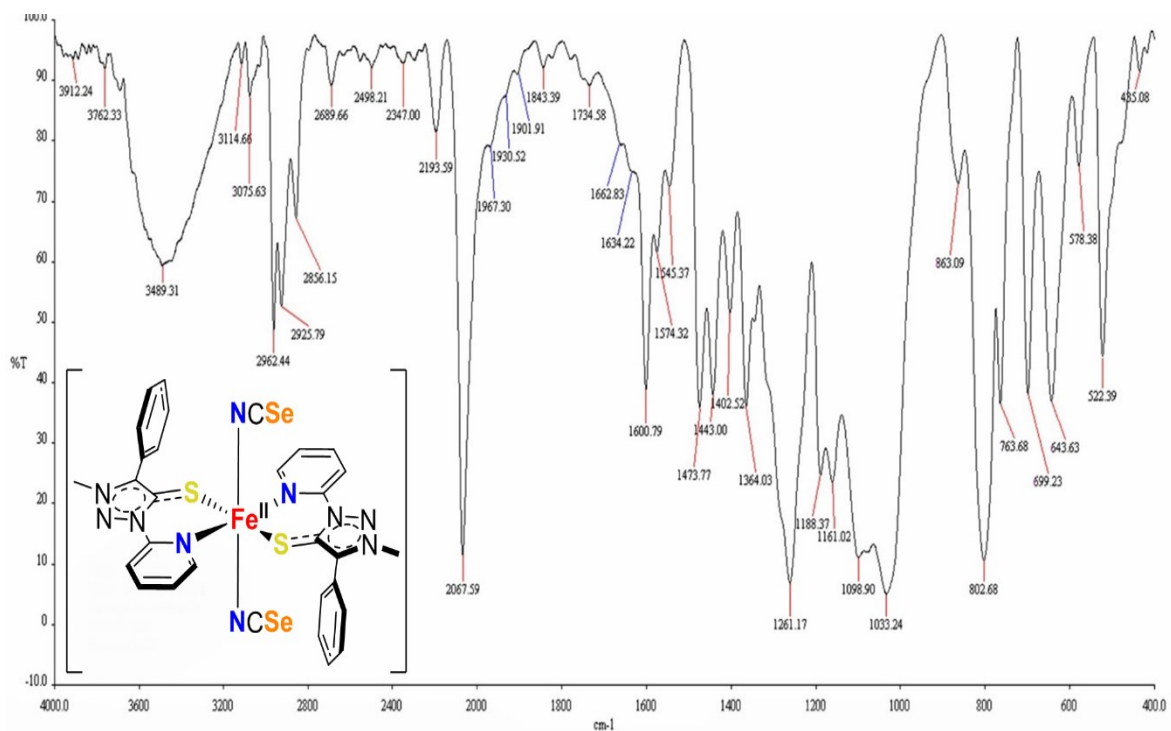

Figure S19. Infrared spectrum for (2b).

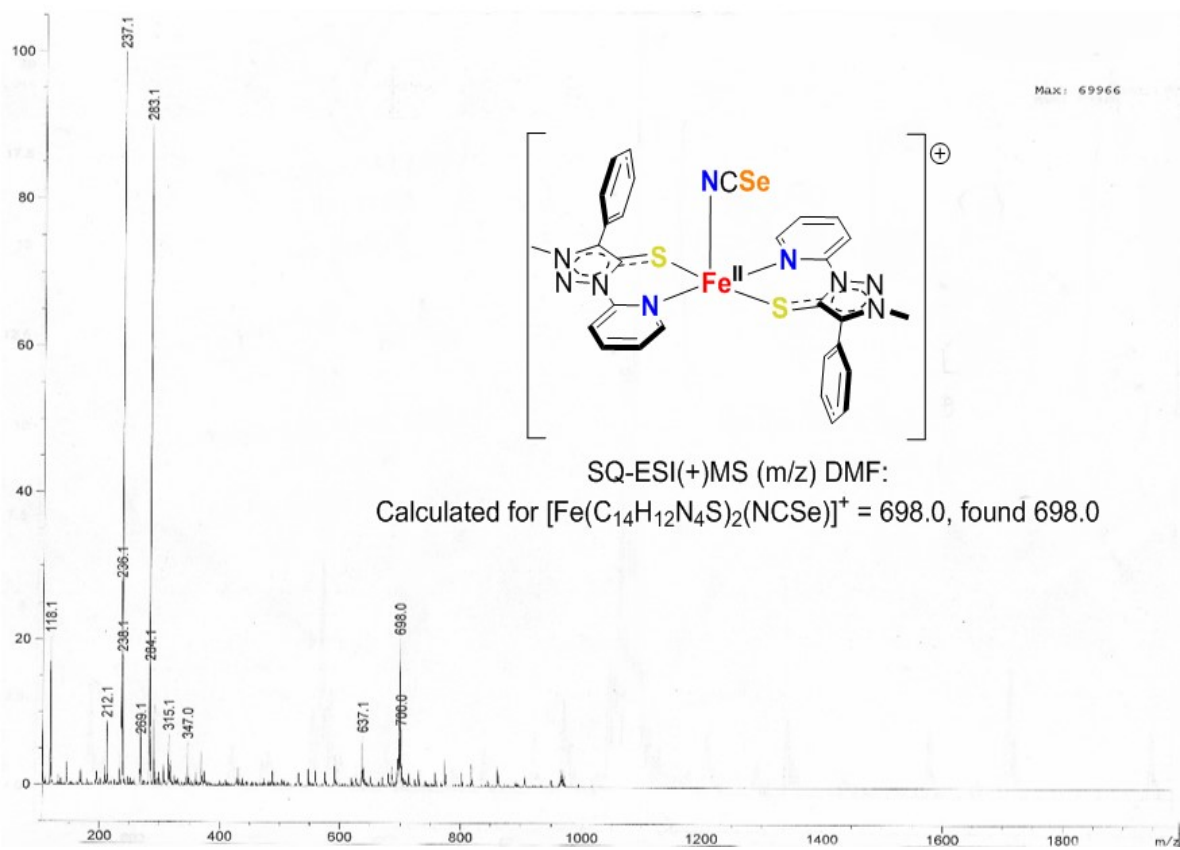

Figure S20. Mass spectrum for (2b).

1.13. Complex  $\text{trans-[Fe}^{\text{II}}(\text{TrzPyS})_2(\text{NCBH}_3)_2]$  (**2c**).

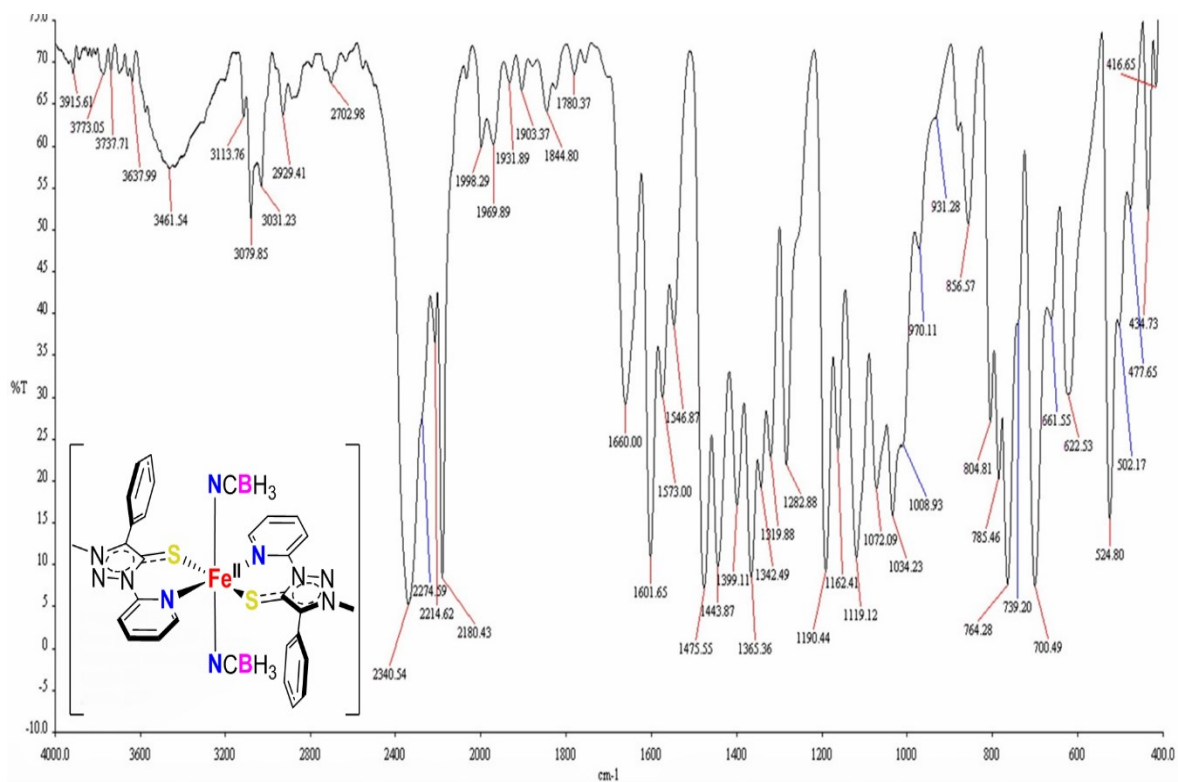

Figure S21. Spectrum for (**2c**).

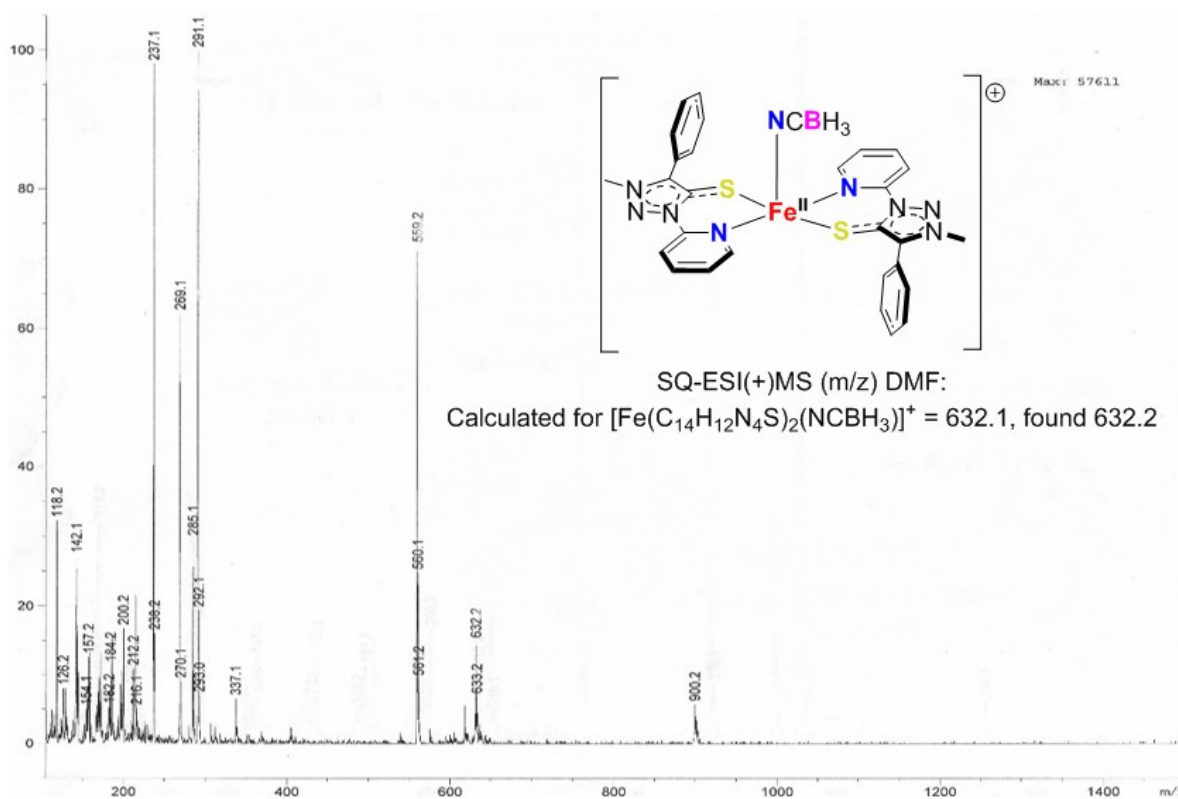

Figure S22. Mass spectrum for (**2c**).

## 2. X-ray analysis.

### 2.1. Single crystal data, structure refinement and selected bond parameters.

Single crystal data, structures refinement and selected bond lengths (Å) and bond angles (°), average bond lengths (Å), average bond angles (°) and Hendrickson octahedral distortion parameter are summarised in the next Tables **S1-S5**.

Table **S1**. Single crystal data and structure refinement for complex family *trans*-[Fe<sup>II</sup>(ImPyS)<sub>2</sub>(NCE)<sub>2</sub>] E = S and Se; complexes **1a** and **1b** respectively.

| Complex                                          | <b>1a</b>                                                                     | <b>1b</b>                                                                                     |
|--------------------------------------------------|-------------------------------------------------------------------------------|-----------------------------------------------------------------------------------------------|
| Empirical formula                                | C <sub>20</sub> H <sub>18</sub> Fe <sub>1</sub> N <sub>8</sub> S <sub>4</sub> | C <sub>20</sub> H <sub>18</sub> Fe <sub>1</sub> N <sub>8</sub> S <sub>2</sub> Se <sub>2</sub> |
| Formula weight                                   | 554.51                                                                        | 648.31                                                                                        |
| Temperature (K)                                  | 150(2)                                                                        | 296(2)                                                                                        |
| Wavelength (Å)                                   | 0.71073                                                                       | 0.71073                                                                                       |
| Crystal system                                   | Monoclinic                                                                    | Monoclinic                                                                                    |
| Space group                                      | <i>P</i> 2 <sub>1</sub> / <i>c</i>                                            | <i>P</i> 2 <sub>1</sub> / <i>c</i>                                                            |
| a (Å)                                            | 9.8211(7)                                                                     | 10.0926(7)                                                                                    |
| b (Å)                                            | 15.7029(11)                                                                   | 15.8607(10)                                                                                   |
| c (Å)                                            | 7.7911(6)                                                                     | 7.8392(5)                                                                                     |
| α (°)                                            | 90                                                                            | 90                                                                                            |
| β (°)                                            | 99.618(2)                                                                     | 99.955(2)                                                                                     |
| γ (°)                                            | 90                                                                            | 90                                                                                            |
| Volume (Å <sup>3</sup> )                         | 1184.65(15)                                                                   | 1235.97(14)                                                                                   |
| Z                                                | 2                                                                             | 2                                                                                             |
| Density (calculated) (g/cm <sup>3</sup> )        | 1.555                                                                         | 1.742                                                                                         |
| Absorption coefficient (mm <sup>-1</sup> )       | 1.016                                                                         | 3.750                                                                                         |
| F(000)                                           | 568                                                                           | 640                                                                                           |
| Crystal size (mm) / colour / shape               | 0.303 x 0.277 x 0.254 / amber / prism                                         | 0.121 x 0.115 x 0.077 / amber / plate                                                         |
| Theta range for data collection (°)              | 2.471 to 32.575                                                               | 2.418 to 26.371                                                                               |
| Index ranges                                     | -14 ≤ h ≤ 14<br>-23 ≤ k ≤ 23<br>-11 ≤ l ≤ 11                                  | -12 ≤ h ≤ 12<br>-19 ≤ k ≤ 19<br>-9 ≤ l ≤ 9                                                    |
| Reflections collected                            | 36368                                                                         | 33828                                                                                         |
| Independent reflections                          | 4290 [R(int) = 0.0355]                                                        | 2527 [R(int) = 0.0744]                                                                        |
| Completeness to theta = 25.242°                  | 98.9 %                                                                        | 100.0 %                                                                                       |
| Max. and min. transmission                       | 0.7465 and 0.7019                                                             | 0.7454 and 0.6393                                                                             |
| Refinement method                                | Full-matrix least-squares on F <sup>2</sup>                                   | Full-matrix least-squares on F <sup>2</sup>                                                   |
| Data / restraints / parameters                   | 4290 / 0 / 152                                                                | 2527 / 0 / 152                                                                                |
| Goodness-of-fit on F <sup>2</sup>                | 1.091                                                                         | 1.027                                                                                         |
| Final R indices [I>2σ(I)]                        | R <sub>1</sub> = 0.0244, wR <sub>2</sub> = 0.0630                             | R <sub>1</sub> = 0.0440, wR <sub>2</sub> = 0.1011                                             |
| R indices (all data)                             | R <sub>1</sub> = 0.0275, wR <sub>2</sub> = 0.0646                             | R <sub>1</sub> = 0.0713, wR <sub>2</sub> = 0.1156                                             |
| Largest diff. peak and hole (e.Å <sup>-3</sup> ) | 0.417 and -0.473                                                              | 0.742 and -0.749                                                                              |

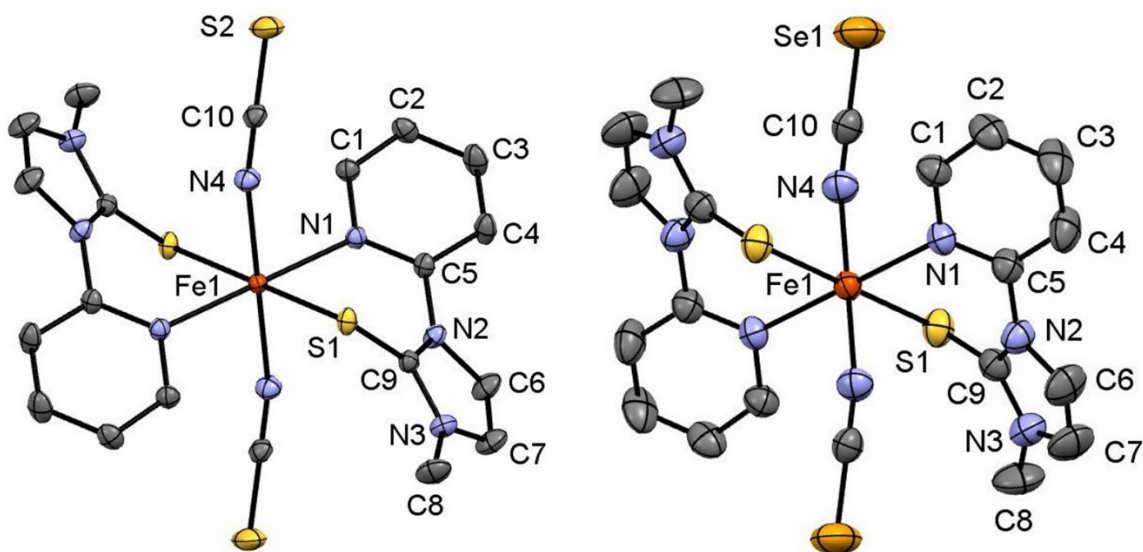

Figure **S23**. Perspective view of complex *trans*-[Fe<sup>II</sup>(ImPyS)<sub>2</sub>(NCS)<sub>2</sub>] (**1a**) acquired at 150(2) K (left), and complex *trans*-[Fe<sup>II</sup>(ImPyS)<sub>2</sub>(NCSe)<sub>2</sub>] (**1b**) acquired at 296(2) K (right). Ellipsoids are drawn at the 50 % probability level. Hydrogen atoms are omitted for the sake of clarity.

Table **S2**. Selected bond lengths (Å) and bond angles (°) of complexes *trans*-[Fe<sup>II</sup>(ImPyS)<sub>2</sub>(NCE)<sub>2</sub>] E = S and Se; complexes **1a** and **1b** respectively.

| Complex               | <b>1a</b>  | <b>1b</b>  |
|-----------------------|------------|------------|
| Temperature (K)       | 150(2)     | 296(2)     |
| Fe(1)-N(1) (Å)        | 2.2474(8)  | 2.249(3)   |
| Fe(1)-N(4) (Å)        | 2.1177(9)  | 2.128(4)   |
| Fe(1)-S(1) (Å)        | 2.4800(3)  | 2.4741(10) |
| C(9)-S(1) (Å)         | 1.6942(10) | 1.687(4)   |
| N(1)-Fe(1)-N(1)#1 (°) | 180.0      | 180.00(15) |
| N(4)-Fe(1)-N(4)#1 (°) | 180.00(4)  | 180.0      |
| S(1)-Fe(1)-S(1)#1 (°) | 180.0      | 180.0      |
| N(1)-Fe(1)-N(4) (°)   | 87.52(3)   | 87.79(13)  |
| N(1)-Fe(1)-N(4)#1 (°) | 92.48(3)   | 92.21(13)  |
| N(4)-Fe(1)-S(1) (°)   | 89.59(3)   | 89.16(10)  |
| N(4)-Fe(1)-S(1)#1 (°) | 90.41(3)   | 90.84(10)  |
| N(1)-Fe(1)-S(1) (°)   | 85.70(2)   | 85.38(8)   |
| N(1)-Fe(1)-S(1)#1 (°) | 94.30(2)   | 94.62(8)   |
| C(9)-S(1)-Fe(1) (°)   | 96.73(3)   | 96.48(14)  |



Table S3. Single crystal data and structure refinement for complexes *trans*-[Fe<sup>II</sup>(TrzPyS)<sub>2</sub>(NCE)<sub>2</sub>] E = S, Se and BH<sub>3</sub>; **2a**, **2b** and **2c** respectively.

| Complex                                          | <b>2a</b>                                                                      | <b>2b</b>                                                                                      | <b>2c</b>                                                                                     |                                                                                               |
|--------------------------------------------------|--------------------------------------------------------------------------------|------------------------------------------------------------------------------------------------|-----------------------------------------------------------------------------------------------|-----------------------------------------------------------------------------------------------|
| Empirical formula                                | C <sub>30</sub> H <sub>24</sub> Fe <sub>1</sub> N <sub>10</sub> S <sub>4</sub> | C <sub>30</sub> H <sub>24</sub> Fe <sub>1</sub> N <sub>10</sub> S <sub>2</sub> Se <sub>2</sub> | C <sub>30</sub> H <sub>30</sub> Fe <sub>1</sub> N <sub>10</sub> S <sub>2</sub> B <sub>2</sub> | C <sub>30</sub> H <sub>30</sub> Fe <sub>1</sub> N <sub>10</sub> S <sub>2</sub> B <sub>2</sub> |
| Formula weight                                   | 708.68                                                                         | 802.48                                                                                         | 672.23                                                                                        | 672.23                                                                                        |
| Temperature (K)                                  | 170(2)                                                                         | 171(2)                                                                                         | 302(2)                                                                                        | 166(2)                                                                                        |
| Wavelength (Å)                                   | 0.71073                                                                        | 0.71073                                                                                        | 0.71073                                                                                       | 0.71073                                                                                       |
| Crystal system                                   | Triclinic                                                                      | Triclinic                                                                                      | Triclinic                                                                                     | Triclinic                                                                                     |
| Space group                                      | <i>P</i> -1                                                                    | <i>P</i> -1                                                                                    | <i>P</i> -1                                                                                   | <i>P</i> -1                                                                                   |
| a (Å)                                            | 8.2200(8)                                                                      | 8.1749(10)                                                                                     | 8.2630(4)                                                                                     | 8.2367(7)                                                                                     |
| b (Å)                                            | 8.4119(8)                                                                      | 8.4576(10)                                                                                     | 8.4919(4)                                                                                     | 8.4429(9)                                                                                     |
| c (Å)                                            | 13.0015(13)                                                                    | 12.8781(16)                                                                                    | 13.1039(7)                                                                                    | 12.9792(13)                                                                                   |
| α (°)                                            | 106.039(3)                                                                     | 104.556(4)                                                                                     | 104.846(2)                                                                                    | 104.946(4)                                                                                    |
| β (°)                                            | 102.841(4)                                                                     | 101.501(4)                                                                                     | 103.820(2)                                                                                    | 103.136(3)                                                                                    |
| γ (°)                                            | 99.914(3)                                                                      | 100.261(4)                                                                                     | 99.454(2)                                                                                     | 99.831(3)                                                                                     |
| Volume (Å <sup>3</sup> )                         | 815.80(14)                                                                     | 819.69(17)                                                                                     | 837.79(7)                                                                                     | 823.62(14)                                                                                    |
| Z                                                | 1                                                                              | 1                                                                                              | 1                                                                                             | 1                                                                                             |
| Density (calculated) (g/cm <sup>3</sup> )        | 1.442                                                                          | 1.626                                                                                          | 1.332                                                                                         | 1.355                                                                                         |
| Absorption coefficient (mm <sup>-1</sup> )       | 0.757                                                                          | 2.846                                                                                          | 0.612                                                                                         | 0.622                                                                                         |
| F(000)                                           | 364                                                                            | 400                                                                                            | 348                                                                                           | 348                                                                                           |
| Crystal size (mm) / colour / shape               | 0.263 x 0.177 x 0.098 /<br>red / prism                                         | 0.196 x 0.181 x 0.054 /<br>red / prism                                                         | 0.088 x 0.058 x 0.022 /<br>yellow / square                                                    | 0.088 x 0.058 x 0.022 /<br>yellow / square                                                    |
| Theta range for data collection (°)              | 2.624 to 27.481                                                                | 2.563 to 26.372                                                                                | 2.556 to 26.732                                                                               | 2.575 to 25.124                                                                               |
| Index ranges                                     | -10 ≤ h ≤ 10<br>-10 ≤ k ≤ 10<br>-16 ≤ l ≤ 16                                   | -10 ≤ h ≤ 10<br>-9 ≤ k ≤ 10<br>-16 ≤ l ≤ 16                                                    | -10 ≤ h ≤ 10<br>-10 ≤ k ≤ 10<br>-16 ≤ l ≤ 16                                                  | -9 ≤ h ≤ 9<br>-10 ≤ k ≤ 10<br>-15 ≤ l ≤ 15                                                    |
| Reflections collected                            | 84766                                                                          | 59596                                                                                          | 87200                                                                                         | 64134                                                                                         |
| Independent reflections                          | 3732 [R(int) = 0.0678]                                                         | 3347 [R(int) = 0.0458]                                                                         | 3564 [R(int) = 0.1879]                                                                        | 2923 [R(int) = 0.0804]                                                                        |
| Completeness to theta = 25.242°                  | 99.8 %                                                                         | 99.8 %                                                                                         | 99.8 %                                                                                        | 99.6 %                                                                                        |
| Max. and min. transmission                       | 0.7273 and 0.6653                                                              | 0.7458 and 0.6205                                                                              | 0.7457 and 0.7265                                                                             | 0.7452 and 0.6934                                                                             |
| Refinement method                                | Full-matrix least-squares on F <sup>2</sup>                                    | Full-matrix least-squares on F <sup>2</sup>                                                    | Full-matrix least-squares on F <sup>2</sup>                                                   | Full-matrix least-squares on F <sup>2</sup>                                                   |
| Data / restraints / parameters                   | 3732 / 0 / 242                                                                 | 3347 / 0 / 253                                                                                 | 3569 / 0 / 246                                                                                | 2923 / 0 / 265                                                                                |
| Goodness-of-fit on F <sup>2</sup>                | 1.052                                                                          | 0.998                                                                                          | 1.112                                                                                         | 1.090                                                                                         |
| Final R indices [I>2σ(I)]                        | R <sub>1</sub> = 0.0269, wR <sub>2</sub> = 0.0695                              | R <sub>1</sub> = 0.0265, wR <sub>2</sub> = 0.0616                                              | R <sub>1</sub> = 0.0445, wR <sub>2</sub> = 0.1053                                             | R <sub>1</sub> = 0.0281, wR <sub>2</sub> = 0.0606                                             |
| R indices (all data)                             | R <sub>1</sub> = 0.0305, wR <sub>2</sub> = 0.0720                              | R <sub>1</sub> = 0.0328, wR <sub>2</sub> = 0.0652                                              | R <sub>1</sub> = 0.0530, wR <sub>2</sub> = 0.1096                                             | R <sub>1</sub> = 0.0369, wR <sub>2</sub> = 0.0637                                             |
| Largest diff. peak and hole (e.Å <sup>-3</sup> ) | 0.314 and -0.526                                                               | 0.543 and -0.591                                                                               | 0.381 and -0.502                                                                              | 0.213 and -0.238                                                                              |

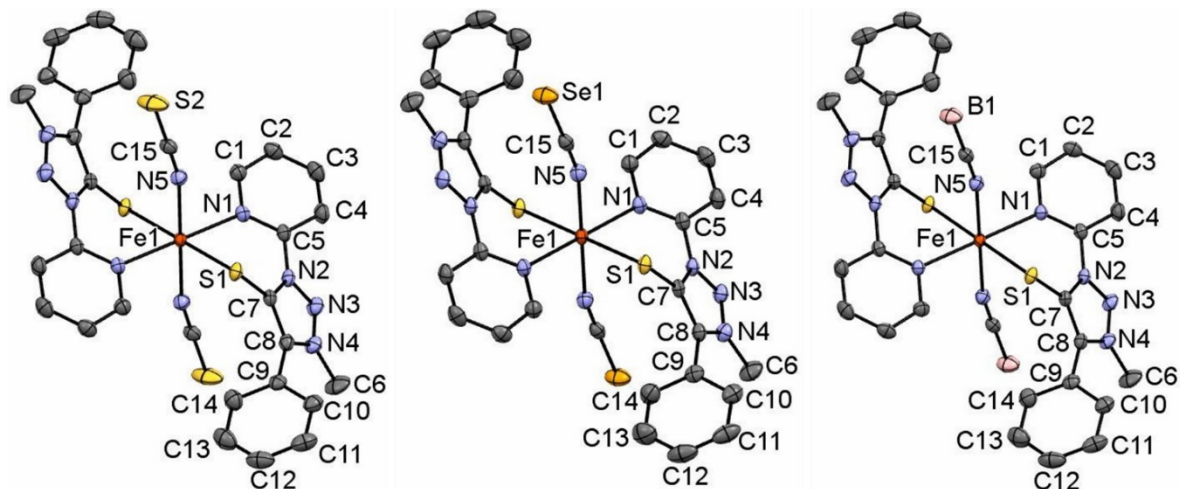

Figure **S24**. Perspective view of the family complex  $trans\text{-}[\text{Fe}^{\text{II}}(\text{TrzPyS})_2(\text{NCE})_2]$  E = S, Se and  $\text{BH}_3$  **2a**, **2b** and **2c** acquired at 170(2) K, 171(2) K and 166(2) K; from left to right respectively. Ellipsoids are drawn at the 50 % probability level. Hydrogen atoms are omitted for the sake of clarity.

Table **S4**. Selected bond lengths (Å) and bond angles (°) of complex family  $trans\text{-}[\text{Fe}^{\text{II}}(\text{TrzPyS})_2(\text{NCE})_2]$  E = S, Se and  $\text{BH}_3$ ; complexes **2a**, **2b** and **2c** respectively.

| Complex               | <b>2a</b>  | <b>2b</b>  | <b>2c</b>  |            |
|-----------------------|------------|------------|------------|------------|
| Temperature (K)       | 170(2)     | 171(2)     | 302(2)     | 166(2)     |
| Fe(1)-N(1) (Å)        | 2.2680(11) | 2.2657(17) | 2.2663(18) | 2.2611(14) |
| Fe(1)-N(5) (Å)        | 2.1201(12) | 2.1418(19) | 2.1453(19) | 2.1443(16) |
| Fe(1)-S(1) (Å)        | 2.4860(4)  | 2.4695(6)  | 2.4818(5)  | 2.4780(5)  |
| C(7)-S(1) (Å)         | 1.7074(13) | 1.708(2)   | 1.709(2)   | 1.7094(17) |
| N(1)-Fe(1)-N(1)#1 (°) | 180.0      | 180.0      | 180.0      | 180.00(7)  |
| N(5)-Fe(1)-N(5)#1 (°) | 180.0      | 180.00(10) | 180.0      | 180.0      |
| S(1)-Fe(1)-S(1)#1 (°) | 180.0      | 180.0      | 180.0      | 180.0      |
| N(1)-Fe(1)-N(5) (°)   | 90.99(4)   | 90.55(7)   | 89.71(7)   | 90.14(5)   |
| N(1)-Fe(1)-N(5)#1 (°) | 89.01(4)   | 89.45(7)   | 90.29(7)   | 89.86(5)   |
| N(5)-Fe(1)-S(1) (°)   | 90.29(3)   | 90.48(5)   | 90.96(5)   | 89.32(4)   |
| N(5)-Fe(1)-S(1)#1 (°) | 89.71(3)   | 89.52(5)   | 89.04(5)   | 90.68(4)   |
| N(1)-Fe(1)-S(1) (°)   | 85.93(3)   | 86.05(5)   | 85.47(5)   | 85.76(4)   |
| N(1)-Fe(1)-S(1)#1 (°) | 94.07(3)   | 93.95(5)   | 94.53(5)   | 94.24(4)   |
| C(7)-S(1)-Fe(1) (°)   | 95.91(4)   | 96.38(7)   | 96.00(7)   | 96.26(6)   |

Table S5. Average bond lengths (Å) and angles (°) and  $\Sigma_{\text{Oh}}$  parameter for the family complex  $\text{trans}[\text{Fe}^{\text{II}}(\text{ImPyS})_2(\text{NCE})_2]$  E = S and Se; complexes **1a** and **1b** respectively,  $\text{trans}[\text{Fe}^{\text{II}}(\text{TrzPyS})_2(\text{NCE})_2]$  E = S, Se and  $\text{BH}_3$ ; complexes **2a**, **2b** and **2c** respectively.  $\Sigma_{\text{Oh}}$  = Hendrickson octahedral distortion parameter.

| Complex                                                 | <b>1a</b> <sup>[a]</sup> | <b>1b</b> <sup>[b]</sup> | <b>2a</b> <sup>[a]</sup> | <b>2b</b> <sup>[b]</sup> | <b>2c</b> <sup>[c]</sup> |            |
|---------------------------------------------------------|--------------------------|--------------------------|--------------------------|--------------------------|--------------------------|------------|
| Temperature (K)                                         | 150(2)                   | 296(2)                   | 170(2)                   | 171(2)                   | 302(2)                   | 166(2)     |
| Space group                                             | <i>P2<sub>1</sub>/c</i>  | <i>P2<sub>1</sub>/c</i>  | <i>P-1</i>               | <i>P-1</i>               | <i>P-1</i>               | <i>P-1</i> |
| Fe-N <sub>Py</sub> (Å)                                  | 2.2474(8)                | 2.249(3)                 | 2.2680(11)               | 2.2657(17)               | 2.2663(18)               | 2.2611(14) |
| Fe-N <sub>NCE</sub> (Å)                                 | 2.1177(9)                | 2.128(4)                 | 2.1201(12)               | 2.1418(19)               | 2.1453(19)               | 2.1443(16) |
| Fe-S (Å)                                                | 2.4800(3)                | 2.4741(10)               | 2.4860(4)                | 2.4695(6)                | 2.4818(5)                | 2.4780(5)  |
| C=S (Å)                                                 | 1.6942(10)               | 1.687(4)                 | 1.7074(13)               | 1.708(2)                 | 1.709(2)                 | 1.7094(17) |
| <i>trans</i> -N <sub>Py</sub> -Fe-N <sub>Py</sub> (°)   | 180.00                   | 180.00(15)               | 180.00                   | 180.00                   | 180.00                   | 180.00(7)  |
| <i>trans</i> -N <sub>NCE</sub> -Fe-N <sub>NCE</sub> (°) | 180.00(4)                | 180.00                   | 180.00                   | 180.00(10)               | 180.00                   | 180.00     |
| <i>trans</i> -S-Fe-S (°)                                | 180.00                   | 180.00                   | 180.00                   | 180.00                   | 180.00                   | 180.00     |
| Fe-S-C (°)                                              | 96.73(3)                 | 96.48(14)                | 95.91(4)                 | 96.38(7)                 | 96.00(7)                 | 96.26(6)   |
| Av. <i>cis</i> -N-Fe-N (°)                              | 90.00(4)                 | 90.00(18)                | 90.00(6)                 | 90.00                    | 90.00(10)                | 90.00(7)   |
| Av. <i>cis</i> -N-Fe-S (°)                              | 90.00(5)                 | 90.00(18)                | 90.00(6)                 | 90.00                    | 90.00(10)                | 90.00(8)   |
| Av. Fe-N-C(E) (°)                                       | 157.21                   | 157.26                   | 165.11                   | 163.97                   | 168.18                   | 166.69     |
| $\Sigma_{\text{Oh}}$ <sup>[d]</sup>                     | 28.76(9)                 | 30.68(36)                | 21.40(12)                | 19.92(20)                | 23.12(20)                | 20.24(15)  |

<sup>[a]</sup> E = S for complexes **1a** and **2a**. <sup>[b]</sup> E = Se for complexes **1b** and **2b**. <sup>[c]</sup> E =  $\text{BH}_3$  for complex **2c**.

<sup>[d]</sup> The octahedral distortion parameter,  $\Sigma_{\text{Oh}}$ , is defined as the sum of the absolute values of the difference of each of the twelve *cis* angles from 90°.  $\Sigma_{\text{Oh}} = 0$  indicates a perfect octahedral geometry.<sup>[S1,2]</sup>

## 2.2. Chemical structure of the literature complexes.<sup>[S3]</sup>

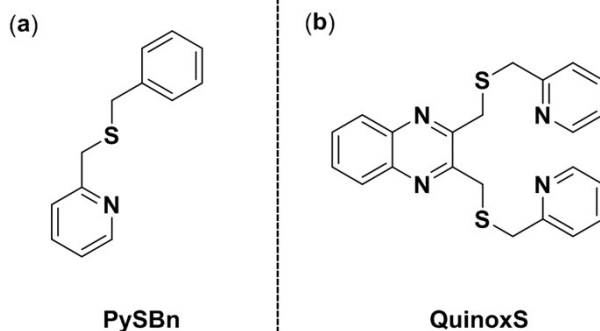

Figure S25. Chemical structure of ligands (a) benzylpicolythioether (**PySBn**) and (b) 2,3-bis(((2-pyridylmethyl)thio)methyl)quinoxaline (**QuinoxS**).<sup>[S3]</sup>

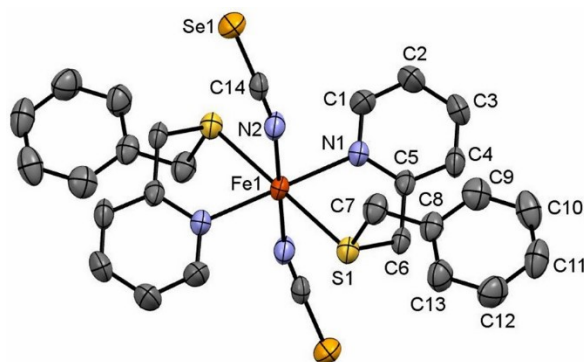

Figure S26. Crystal structure view of complex *trans*-[Fe<sup>II</sup>(PySBn)<sub>2</sub>(NCSe)<sub>2</sub>] **3b** acquired at 199(2) K. Ellipsoids are drawn at the 50 % probability level. Hydrogen atoms are omitted for the sake of clarity.<sup>[S3]</sup>

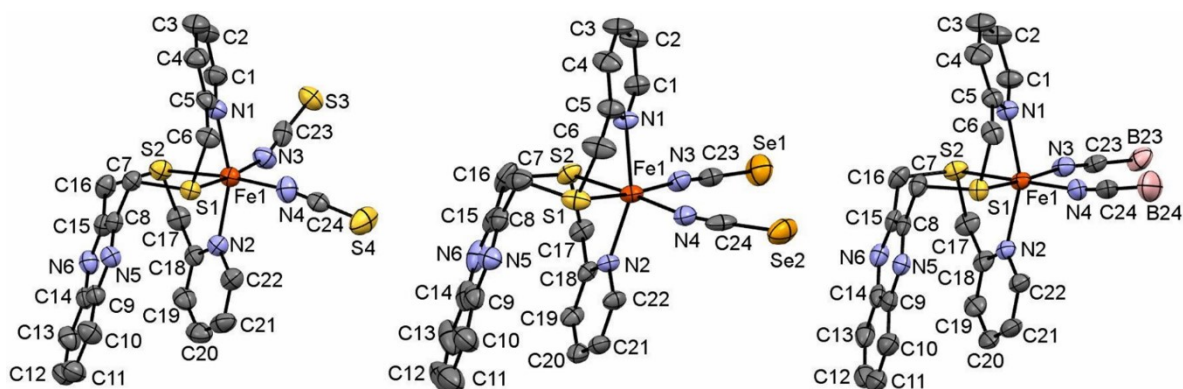

Figure S27. Crystal structure of the family complex *cis*-[Fe<sup>II</sup>(QuinoxS)(NCE)<sub>2</sub>] E = S, Se and BH<sub>3</sub>; complexes **4a**, **4b** and **4c** acquired at 177(2) K, 177(2) K and 175(2) K; left, centre and right respectively. Ellipsoids are drawn at the 50 % probability level. Hydrogen atoms and acetonitrile solvent molecules are omitted for the sake of clarity.<sup>[S3]</sup>

### 2.3. Comparison of structural parameters with literature complexes of iron(II) in {N<sub>4</sub>S<sub>2</sub>} coordination sphere.<sup>[S3-5]</sup>

In order to compare the structural characteristics of the complexes for this work with Fe<sup>II</sup>(N<sub>4</sub>S<sub>2</sub>) SCO-active complexes published in the literature, which contain cyanide co-ligands NCE E = S, Se and BH<sub>3</sub>, Table S6 shows the most relevant structural parameters for complex *trans*-[Fe<sup>II</sup>(PySBn)<sub>2</sub>(NCSe)<sub>2</sub>] and complex family *cis*-[Fe<sup>II</sup>(QuinoxS)(NCE)<sub>2</sub>] E = S, Se and BH<sub>3</sub>, PySBn = benzylpicolythioether and QuinoxS = 2,3-bis(((2-pyridylmethyl)thio)methyl)quinoxaline.

Table S6. Average bond lengths (Å) and angles (°) and Σ<sub>Oh</sub> parameter for complexes *trans*-[Fe<sup>II</sup>(ImPyS)<sub>2</sub>(NCE)<sub>2</sub>] E = S and Se, **1a** and **1b** respectively; complexes *trans*-[Fe<sup>II</sup>(TrzPyS)<sub>2</sub>(NCE)<sub>2</sub>] E = S, Se and BH<sub>3</sub>, **2a**, **2b** and **2c** respectively; complex<sup>[S3]</sup> *trans*-[Fe<sup>II</sup>(PySBn)<sub>2</sub>(NCSe)<sub>2</sub>] **3b** and complexes<sup>[S3]</sup> *cis*-[Fe<sup>II</sup>(QuinoxS)(NCE)<sub>2</sub>] E = S, Se and BH<sub>3</sub>, **4a**, **4b** and **4c** respectively. Σ<sub>Oh</sub> = Hendrickson octahedral distortion parameter.

| Complex                                                 | <b>1a</b> <sup>[b]</sup>           | <b>1b</b> <sup>[c]</sup>           | <b>2a</b> <sup>[b]</sup> | <b>2b</b> <sup>[c]</sup> | <b>2c</b> <sup>[d]</sup> |             | <b>3b</b> <sup>[a, c]</sup> | <b>4a</b> <sup>[a, b]</sup>        |                                    | <b>4b</b> <sup>[a, c]</sup> |             | <b>4c</b> <sup>[d]</sup> |             |
|---------------------------------------------------------|------------------------------------|------------------------------------|--------------------------|--------------------------|--------------------------|-------------|-----------------------------|------------------------------------|------------------------------------|-----------------------------|-------------|--------------------------|-------------|
| SCO activity                                            | No                                 | No                                 | No                       | No                       | No                       |             | Yes                         | No                                 |                                    | No                          |             | No                       |             |
| Temperature (K)                                         | 150(2)                             | 296(2)                             | 170(2)                   | 171(2)                   | 302(2)                   | 166(2)      | 199(2)                      | 297(2)                             | 177(2)                             | 298(2)                      | 177(2)      | 298(2)                   | 175(2)      |
| Spin state                                              | High                               | High                               | High                     | High                     | High                     | High        | High                        | High                               | High                               | High                        | High        | High                     | High        |
| Space group                                             | <i>P</i> 2 <sub>1</sub> / <i>c</i> | <i>P</i> 2 <sub>1</sub> / <i>c</i> | <i>P</i> -1              | <i>P</i> -1              | <i>P</i> -1              | <i>P</i> -1 | <i>C</i> 2/ <i>c</i>        | <i>P</i> 2 <sub>1</sub> / <i>c</i> | <i>P</i> 2 <sub>1</sub> / <i>c</i> | <i>P</i> -1                 | <i>P</i> -1 | <i>P</i> -1              | <i>P</i> -1 |
| Fe-N <sub>Py</sub> (Å)                                  | 2.2474(8)                          | 2.249(3)                           | 2.2680(11)               | 2.2657(17)               | 2.2663(18)               | 2.2611(14)  | 2.182(4)                    | 2.181(4)                           | 2.177(4)                           | 2.167(7)                    | 2.094(8)    | 2.163(6)                 | 2.127(6)    |
| Fe-N <sub>NCE</sub> (Å)                                 | 2.1177(9)                          | 2.128(4)                           | 2.1201(12)               | 2.1418(19)               | 2.1453(19)               | 2.1443(16)  | 2.105(4)                    | 2.090(4)                           | 2.094(4)                           | 2.089(19)                   | 2.091(10)   | 2.106(8)                 | 2.107(7)    |
| Fe-S (Å)                                                | 2.4800(3)                          | 2.4741(10)                         | 2.4860(4)                | 2.4695(6)                | 2.4818(5)                | 2.4780(5)   | 2.6004(13)                  | 2.6069(13)                         | 2.5964(13)                         | 2.6142(28)                  | 2.6044(32)  | 2.5978(26)               | 2.5899(23)  |
| C=S (Å)                                                 | 1.6942(10)                         | 1.687(4)                           | 1.7074(13)               | 1.708(2)                 | 1.709(2)                 | 1.7094(17)  | -                           | -                                  | -                                  | -                           | -           | -                        | -           |
| <i>trans</i> -N <sub>Py</sub> -Fe-N <sub>Py</sub> (°)   | 180.00                             | 180.00(15)                         | 180.00                   | 180.00                   | 180.00                   | 180.00(7)   | 180.00                      | 158.02(10)                         | 158.70(10)                         | 155.74(21)                  | 156.59(23)  | 157.66(18)               | 158.87(17)  |
| <i>trans</i> -N <sub>NCE</sub> -Fe-N <sub>NCE</sub> (°) | 180.00(4)                          | 180.00                             | 180.00                   | 180.00(10)               | 180.00                   | 180.00      | 180.00                      | -                                  | -                                  | -                           | -           | -                        | -           |
| <i>trans</i> -S-Fe-N <sub>NCE</sub> (°)                 | -                                  | -                                  | -                        | -                        | -                        | -           | -                           | 172.88(13)                         | 172.505(13)                        | 173.52(26)                  | 173.20(29)  | 172.13(22)               | 172.00(20)  |
| <i>trans</i> -S-Fe-S (°)                                | 180.00                             | 180.00                             | 180.00                   | 180.00                   | 180.00                   | 180.00      | 180.00                      | -                                  | -                                  | -                           | -           | -                        | -           |
| Fe-S-C (°)                                              | 96.73(3)                           | 96.48(14)                          | 95.91(4)                 | 96.38(7)                 | 96.00(7)                 | 96.26(6)    | -                           | -                                  | -                                  | -                           | -           | -                        | -           |
| Av. <i>cis</i> -N-Fe-N (°)                              | 90.00(4)                           | 90.00(18)                          | 90.00(6)                 | 90.00(10)                | 90.00(10)                | 90.00(7)    | 90.00(21)                   | 96.82(25)                          | 96.56(26)                          | 97.24(50)                   | 96.96(54)   | 96.44(42)                | 95.99(38)   |
| Av. <i>cis</i> -S-Fe-S (°)                              | -                                  | -                                  | -                        | -                        | -                        | -           | -                           | 98.95(3)                           | 99.28(3)                           | 101.00(7)                   | 101.37(7)   | 101.78(6)                | 101.81(6)   |
| Av. <i>cis</i> -N-Fe-S (°)                              | 90.00(5)                           | 90.00(18)                          | 90.00(6)                 | 90.00(10)                | 90.00(10)                | 90.00(8)    | 90.00(23)                   | 83.15(19)                          | 83.35(20)                          | 82.60(39)                   | 82.81(43)   | 83.35(33)                | 83.62(30)   |
| Av. Fe-N-C(E) (°)                                       | 157.21                             | 157.26                             | 165.11                   | 163.97                   | 168.18                   | 166.69      | 155.30                      | 160.8(4)                           | 161.1(4)                           | 163.3(6)                    | 163.4(1.2)  | 167.0(8)                 | 166.5(8)    |
| Σ <sub>Oh</sub> <sup>[e]</sup> (°)                      | 28.76(9)                           | 30.68(36)                          | 21.4(12)                 | 19.92(20)                | 23.12(20)                | 20.24(15)   | 81.02(44)                   | 84.17(32)                          | 82.00(33)                          | 91.58(64)                   | 89.32(69)   | 83.87(54)                | 80.06(67)   |

<sup>[a]</sup> Crystal data taken from the published reference.<sup>[S3]</sup> <sup>[b]</sup> E = S for complexes **1a**, **2a** and **4a**. <sup>[c]</sup> E = Se for complexes **1b**, **2b**, **3b** and **4b**. <sup>[d]</sup> E = BH<sub>3</sub> for complex **2c** and **4c**. <sup>[e]</sup> The octahedral distortion parameter, Σ<sub>Oh</sub>, is defined as the sum of the absolute values of the difference of each of the twelve *cis* angles from 90°. Σ<sub>Oh</sub> = 0 indicates a perfect octahedral geometry.<sup>[S1,2]</sup>

In order to compare the structural characteristics of the complexes for this work with Fe<sup>II</sup>(N<sub>4</sub>S<sub>2</sub>) SCO-active complexes published in the literature,<sup>[S4,5]</sup> which contain cyanide co-ligands NCE E = S, Se and BH<sub>3</sub>, Table S7 shows the most relevant structural parameters for complex family *cis*-[Fe<sup>II</sup>(bpte)<sub>2</sub>(NCE)<sub>2</sub>] E = S, Se and BH<sub>3</sub>, bpte = *S,S'*-bis(2-pyridylmethyl)-1,2-thioethane.

Table S7. Average bond distances (Å) and angles (°) and Σ<sub>Oh</sub> parameter for complex family *cis*-[Fe<sup>II</sup>(bpte)<sub>2</sub>(NCE)<sub>2</sub>] E = S, Se and BH<sub>3</sub>, bpte = *S,S'*-bis(2-pyridylmethyl)-1,2-thioethane.<sup>[S4,5]</sup>

| Complex                                               | [Fe <sup>II</sup> (bpte) <sub>2</sub> (NCS) <sub>2</sub> ] <sup>[a]</sup> |             | α-Fe <sup>II</sup> (bpte) <sub>2</sub> (NCSe) <sub>2</sub> <sup>[b,c]</sup> |                         | β-[Fe <sup>II</sup> (bpte) <sub>2</sub> (NCSe) <sub>2</sub> ] <sup>[b]</sup> |             | γ-[Fe <sup>II</sup> (bpte) <sub>2</sub> (NCSe) <sub>2</sub> ] <sup>[b,c]</sup> |                         | [Fe <sup>II</sup> (bpte) <sub>2</sub> (NCBH <sub>3</sub> ) <sub>2</sub> ] <sup>[a]</sup> |             |
|-------------------------------------------------------|---------------------------------------------------------------------------|-------------|-----------------------------------------------------------------------------|-------------------------|------------------------------------------------------------------------------|-------------|--------------------------------------------------------------------------------|-------------------------|------------------------------------------------------------------------------------------|-------------|
|                                                       | No                                                                        |             | Yes                                                                         |                         | No                                                                           |             | Yes                                                                            |                         | Yes                                                                                      |             |
| Temperature (K)                                       | 90(2)                                                                     | 230(2)      | 90(2)                                                                       | 300(2)                  | 120(2)                                                                       | 300(2)      | 100(2)                                                                         | 300(2)                  | 150(2)                                                                                   | 295(2)      |
| Spin state                                            | High                                                                      | High        | Low                                                                         | High                    | High                                                                         | High        | Low                                                                            | High                    | Low                                                                                      | High        |
| Space group                                           | <i>Pbcn</i>                                                               | <i>Pbcn</i> | <i>P2<sub>1</sub>/n</i>                                                     | <i>P2<sub>1</sub>/c</i> | <i>C2/c</i>                                                                  | <i>C2/c</i> | <i>P2<sub>1</sub>/c</i>                                                        | <i>P2<sub>1</sub>/c</i> | <i>C2/c</i>                                                                              | <i>C2/c</i> |
| Av. Fe-N <sub>Py</sub> (Å)                            | 2.198(2)                                                                  | 2.206(2)    | 2.001(3)                                                                    | 2.199(3)                | 2.1758(11)                                                                   | 2.1799(15)  | 2.007(3)                                                                       | 2.192(3)                | 2.008(2)                                                                                 | 2.161(1)    |
| Av. Fe-N <sub>NCE</sub> (Å)                           | 2.076(2)                                                                  | 2.075(2)    | 1.947(3)                                                                    | 2.080(3)                | 2.0925(13)                                                                   | 2.0870(18)  | 1.952(3)                                                                       | 2.071(3)                | 1.960(2)                                                                                 | 2.093(2)    |
| Av. Fe-S (Å)                                          | 2.5416(6)                                                                 | 2.556(1)    | 2.2383(9)                                                                   | 2.547(1)                | 2.6034(4)                                                                    | 2.6117(6)   | 2.239(1)                                                                       | 2.551(1)                | 2.2503(5)                                                                                | 2.5233(9)   |
| <i>trans</i> -N <sub>Py</sub> -Fe-N <sub>Py</sub> (°) | 158.76(9)                                                                 | 160.07(9)   | 174.3(1)                                                                    | 162.8(1)                | 170.95(6)                                                                    | 170.21(8)   | 172.5(1)                                                                       | 161.7(1)                | 177.91(8)                                                                                | 170.64(7)   |
| Av. <i>trans</i> -S-Fe-N <sub>NCE</sub> (°)           | 174.91(8)                                                                 | 173.74(8)   | 170.44(13)                                                                  | 173.2(1)                | 166.48(6)                                                                    | 166.37(8)   | 178.93(12)                                                                     | 171.89(13)              | 176.12(6)                                                                                | 169.23(6)   |
| Av. <i>cis</i> -N-Fe-N (°)                            | 95.37(18)                                                                 | 95.24(20)   | 92.29(24)                                                                   | 95.00(30)               | 95.41(8)                                                                     | 95.52(17)   | 91.66(24)                                                                      | 95.03(24)               | 91.09(15)                                                                                | 93.56(15)   |
| Av. <i>cis</i> -S-Fe-S (°)                            | 86.37(3)                                                                  | 84.99(5)    | 90.26(4)                                                                    | 84.48(5)                | 81.227(17)                                                                   | 80.68(2)    | 90.87(3)                                                                       | 83.29(3)                | 89.75(3)                                                                                 | 84.17(4)    |
| Av. <i>cis</i> -N-Fe-S (°)                            | 84.10(12)                                                                 | 84.44(12)   | 88.14(18)                                                                   | 85.12(19)               | 86.55(12)                                                                    | 99.04(12)   | 87.84(18)                                                                      | 84.83(18)               | 88.70(9)                                                                                 | 86.51(10)   |
| Av. Fe-N-C(E) (°)                                     | 167.53                                                                    | 165.92      | 166.8(60)                                                                   | 163.5(50)               | 149.97(17)                                                                   | 150.13(25)  | 173.68(60)                                                                     | 171.4(60)               | 165.65                                                                                   | 161.88      |
| Σ <sub>Oh</sub> <sup>[d]</sup>                        | 68.2(2)                                                                   | 67.4(3)     | 35.24(3)                                                                    | 60.75(8)                | 73.11(15)                                                                    | 73.33(21)   | 24.64                                                                          | 67.75                   | 41.7(2)                                                                                  | 62.8(2)     |

<sup>[a]</sup> Crystal data taken from the published reference.<sup>[S4]</sup> <sup>[b]</sup> Crystal data taken from the published reference.<sup>[S5]</sup> <sup>[c]</sup> There are two symmetry independent complex molecule in the structure of polymorphs α at 90(2) K and γ at 150(2) K and 295(2) K. <sup>[d]</sup> The octahedral distortion parameter of Hendrickson, Σ<sub>Oh</sub>, is defined as the sum of the absolute values of the difference of each of the twelve cis angles from 90°. Σ<sub>Oh</sub> = 0 indicates a perfect octahedral geometry.<sup>[S1,2]</sup>

## 2.4. Supramolecular analysis.

### 2.4.1. Supramolecular interactions of complexes $trans$ -[Fe<sup>II</sup>(ImPyS)<sub>2</sub>(NCE)<sub>2</sub>] E = S, Se; complexes **1a** and **1b** respectively.

The supramolecular interactions present in the crystal structure of complexes **1a** and **1b** comprise CH $\cdots\pi$  and CH $\cdots$ E (E = S or Se) hydrogen bonds, Figure S28. The former arises from the interaction between C-H of a pyridine ring at the 3-position with the centroid of a pyridine ring of a neighbouring complex molecule. Whilst, the CH $\cdots$ E (E = S or Se) interactions are formed between the 4-position C-H of the pyridine ring with the coordinated Se-CN co-ligand of a neighbouring complex molecule, in addition the 4-position C-H of the imidazolyl ring interacts with the coordinated Se-CN co-ligand of a different neighbouring molecule. Finally, there is an interaction between the CH<sub>3</sub> group of the imidazolyl ligand with the Se-CN co-ligand of a neighbouring complex. Both types of interactions can be considered weak to medium strength with range values from 3.492—4.018 Å, Figure S28. All this type of interactions form 2D sheets within the crystal structure.

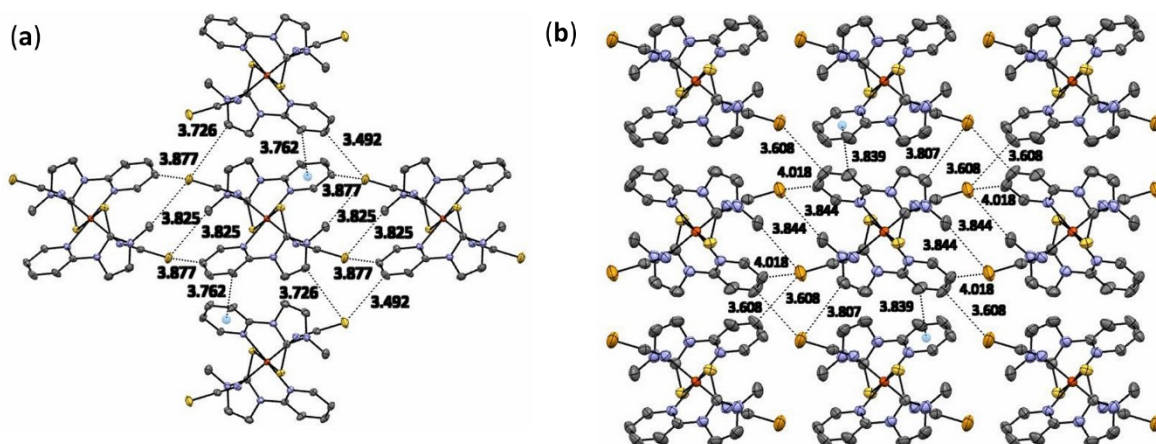

Figure S28. Supramolecular C-H $\cdots\pi$  y C-H $\cdots$ E (E = S or Se) interactions present in the crystal structure of complexes **1a** at 150(2) K (a) and **1b** at 296(2) K (b). Ellipsoids are drawn at 50 % probability level. Hydrogen atoms are omitted for the sake of clarity.

### 2.4.2. Supramolecular interactions of family complex $trans$ -[Fe<sup>II</sup>(TrzPyS)<sub>2</sub>(NCE)<sub>2</sub>] E = S, Se and BH<sub>3</sub>; complexes **2a**, **2b** and **2c** respectively.

In the case of complexes **2a-c** it is possible to observe two types of  $\pi$ - $\pi$  interactions within the crystal structure. One of them comprises a moderate interaction between two off-set pyridine rings of neighbouring complex molecules, blue centroids Figure S29, with a distance between centroids ranging 3.527—2.557 Å. The second type of off-set  $\pi$ - $\pi$  interaction occurs between a pyridine ring and the phenyl ring of a neighbouring complex molecule, (grey centroid for phenyl ring in Figure S29) with a centroid-centroid distance varying 4.041—4.097 Å, indicating a weak interaction and forming a supramolecular polymer. In addition, it is possible to observe H-bond interactions between the methyl group and a C-H group of a pyridine ring with the E (E = S, Se and BH<sub>3</sub>) atom of the co-ligand, both of them being weak interactions with a value ranging 3.763—2.557 Å, Figure S29.

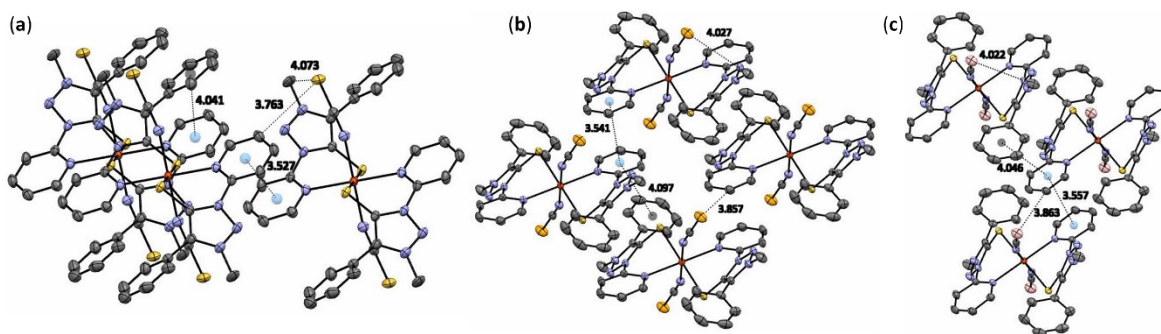

Figure S29. Supramolecular  $\pi$ - $\pi$  and C-H $\cdots$ E (E = S, Se and BH<sub>3</sub>) interactions observed for complexes **2a** at 170(2) K (a), **2b** at 171(2) K and **2c** at 166(2) K. Ellipsoids are drawn at 50 % probability level. Hydrogen atoms are omitted for the sake of clarity.

### 3. DFT Calculations

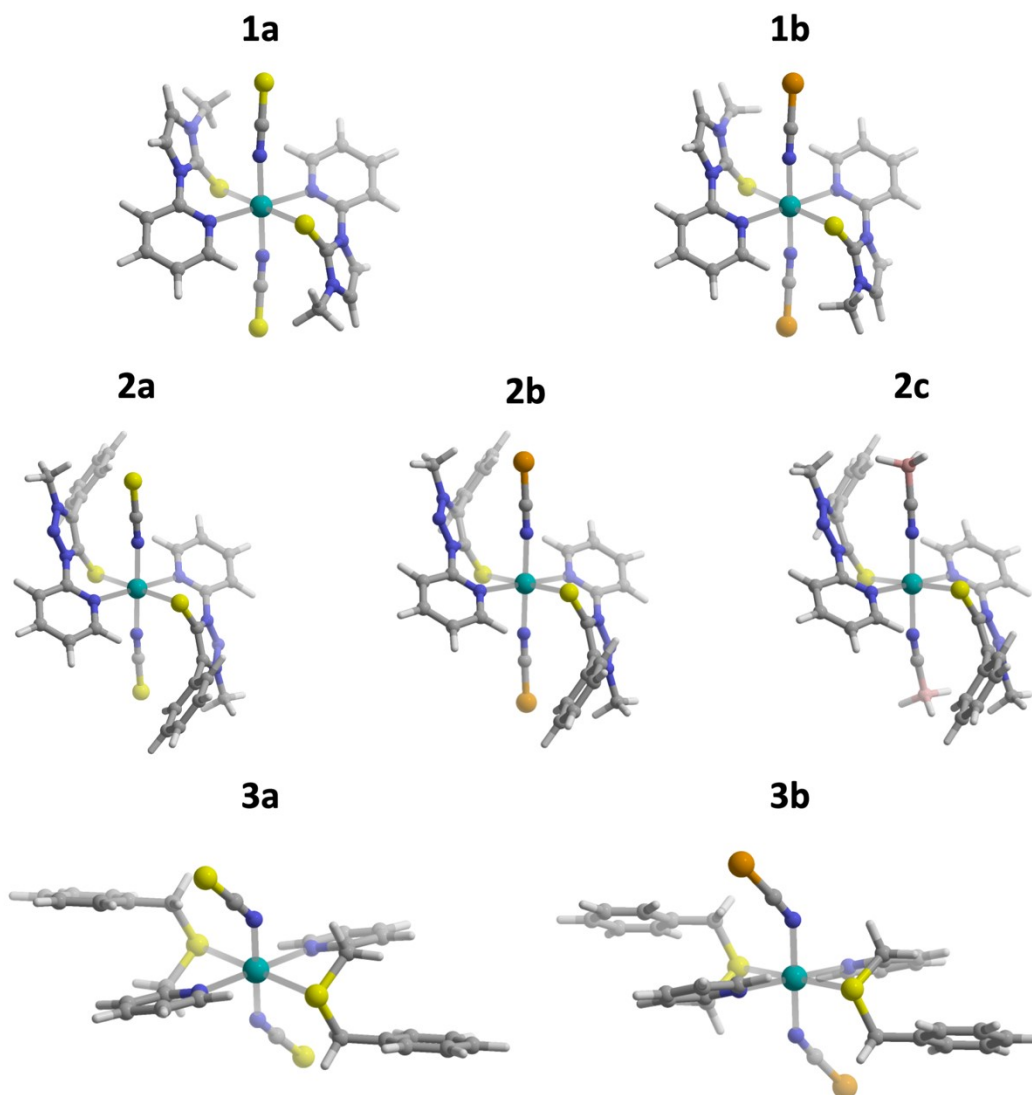

Figure S30. Optimised geometries for the iron(II) complexes in the HS-state.



Table S8. Experimental and calculated Fe-L bond length distances, showing the percentage deviations compared to the experimental HS-structures; as expected the LS-states show larger deviations.

| Complex | Ligand | Fe-L bond length (Å) |               |               | Deviations (%) |         |
|---------|--------|----------------------|---------------|---------------|----------------|---------|
|         |        | X-ray                | Calculated LS | Calculated HS | LS             | HS      |
| 1a      | N_ax   | 2.1176               | 1.9818        | 2.0640        | -6.4162        | -2.5319 |
|         | N_ax   | 2.1176               | 1.9817        | 2.0640        | -6.4176        | -2.5327 |
|         | N_eq   | 2.2474               | 2.0782        | 2.3111        | -7.5309        | 2.8330  |
|         | N_eq   | 2.2474               | 2.0783        | 2.3110        | -7.5254        | 2.8300  |
|         | S_eq   | 2.4800               | 2.4080        | 2.6170        | -2.9043        | 5.5231  |
|         | S_eq   | 2.4800               | 2.4079        | 2.6169        | -2.9052        | 5.5200  |
| 1b      | N_ax   | 2.1279               | 1.9787        | 2.0770        | -7.0116        | -2.3920 |
|         | N_ax   | 2.1279               | 1.9787        | 2.0770        | -7.0092        | -2.3933 |
|         | N_eq   | 2.2481               | 2.0782        | 2.3027        | -7.5576        | 2.4280  |
|         | N_eq   | 2.2481               | 2.0788        | 2.3026        | -7.5312        | 2.4234  |
|         | S_eq   | 2.4741               | 2.4033        | 2.6067        | -2.8614        | 5.3596  |
|         | S_eq   | 2.4741               | 2.4041        | 2.6066        | -2.8284        | 5.3566  |
| 2a      | N_ax   | 2.1201               | 1.9753        | 2.0849        | -6.8281        | -1.6569 |
|         | N_ax   | 2.1201               | 1.9754        | 2.0851        | -6.8245        | -1.6470 |
|         | N_eq   | 2.2680               | 2.0669        | 2.2891        | -8.8650        | 0.9317  |
|         | N_eq   | 2.2680               | 2.0669        | 2.2890        | -8.8672        | 0.9282  |
|         | S_eq   | 2.4860               | 2.3899        | 2.5795        | -3.8652        | 3.7629  |
|         | S_eq   | 2.4860               | 2.3897        | 2.5792        | -3.8734        | 3.7506  |
| 2b      | N_ax   | 2.1417               | 1.9708        | 2.0990        | -7.9797        | -1.9954 |
|         | N_ax   | 2.1417               | 1.9706        | 2.0989        | -7.9890        | -1.9987 |
|         | N_eq   | 2.2658               | 2.0658        | 2.2868        | -8.8278        | 0.9262  |
|         | N_eq   | 2.2658               | 2.0657        | 2.2869        | -8.8310        | 0.9288  |
|         | S_eq   | 2.4696               | 2.3866        | 2.5598        | -3.3611        | 3.6545  |
|         | S_eq   | 2.4696               | 2.3881        | 2.5599        | -3.3002        | 3.6565  |
| 2c      | N_ax   | 2.1443               | 1.9714        | 2.1257        | -8.0633        | -0.8687 |
|         | N_ax   | 2.1443               | 1.9715        | 2.1191        | -8.0592        | -1.1752 |
|         | N_eq   | 2.2611               | 2.0673        | 2.2856        | -8.5737        | 1.0822  |
|         | N_eq   | 2.2611               | 2.0672        | 2.2770        | -8.5786        | 0.7027  |
|         | S_eq   | 2.4780               | 2.3848        | 2.5384        | -3.7619        | 2.4385  |
|         | S_eq   | 2.4780               | 2.3844        | 2.5376        | -3.7763        | 2.4058  |
| 3b      | N_ax   | 2.1050               | 1.9528        | 2.0690        | -7.2292        | -1.7123 |
|         | N_ax   | 2.1050               | 1.9528        | 2.0690        | -7.2330        | -1.7108 |
|         | N_eq   | 2.1816               | 2.0452        | 2.2385        | -6.2565        | 2.6069  |
|         | N_eq   | 2.1816               | 2.0472        | 2.2385        | -6.1615        | 2.6060  |
|         | S_eq   | 2.6004               | 2.3296        | 2.6351        | -10.4112       | 1.3363  |
|         | S_eq   | 2.6004               | 2.3131        | 2.6352        | -11.0475       | 1.3379  |

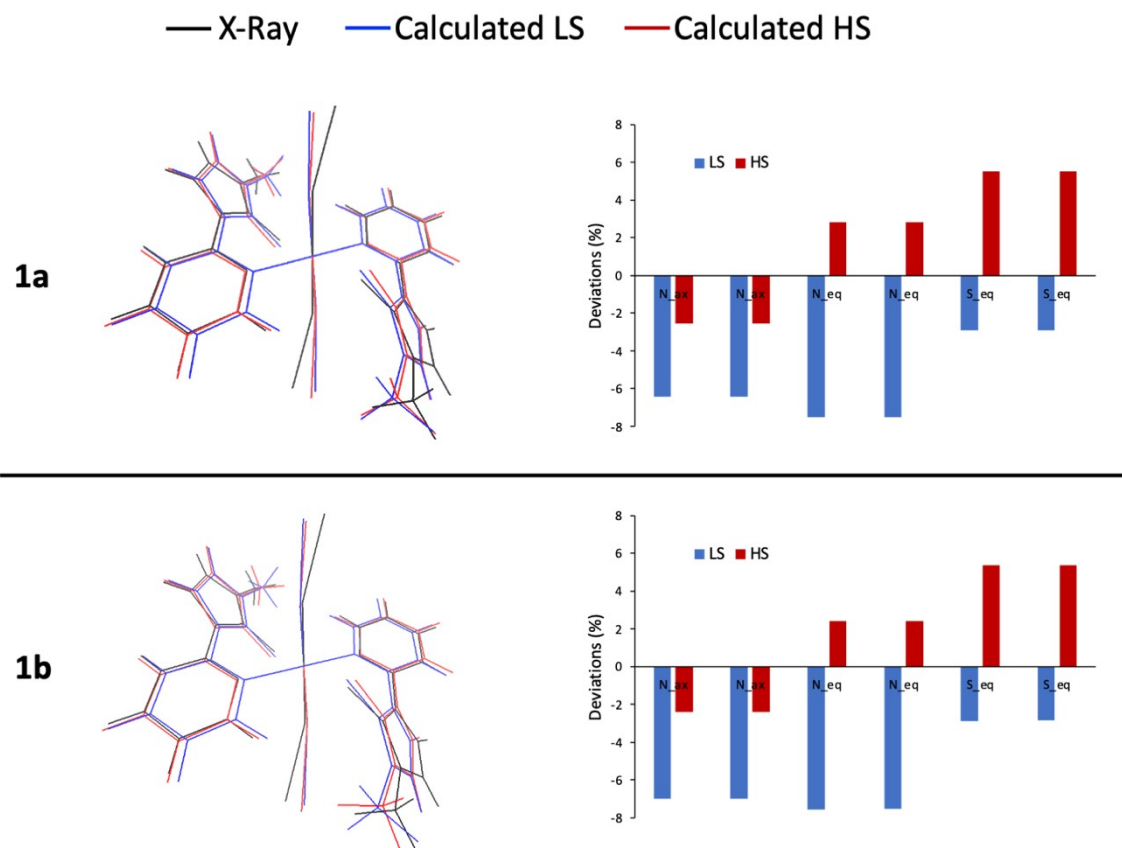

Figure S31. Left: Overlaid structures for the calculated HS-state (red), calculated LS-state (blue) and the experimental X-ray structure (black) for complexes **1a** and **1b**. Right: Percentage deviations bar plot for the six Fe-L bond lengths for complexes **1a** and **1b**.

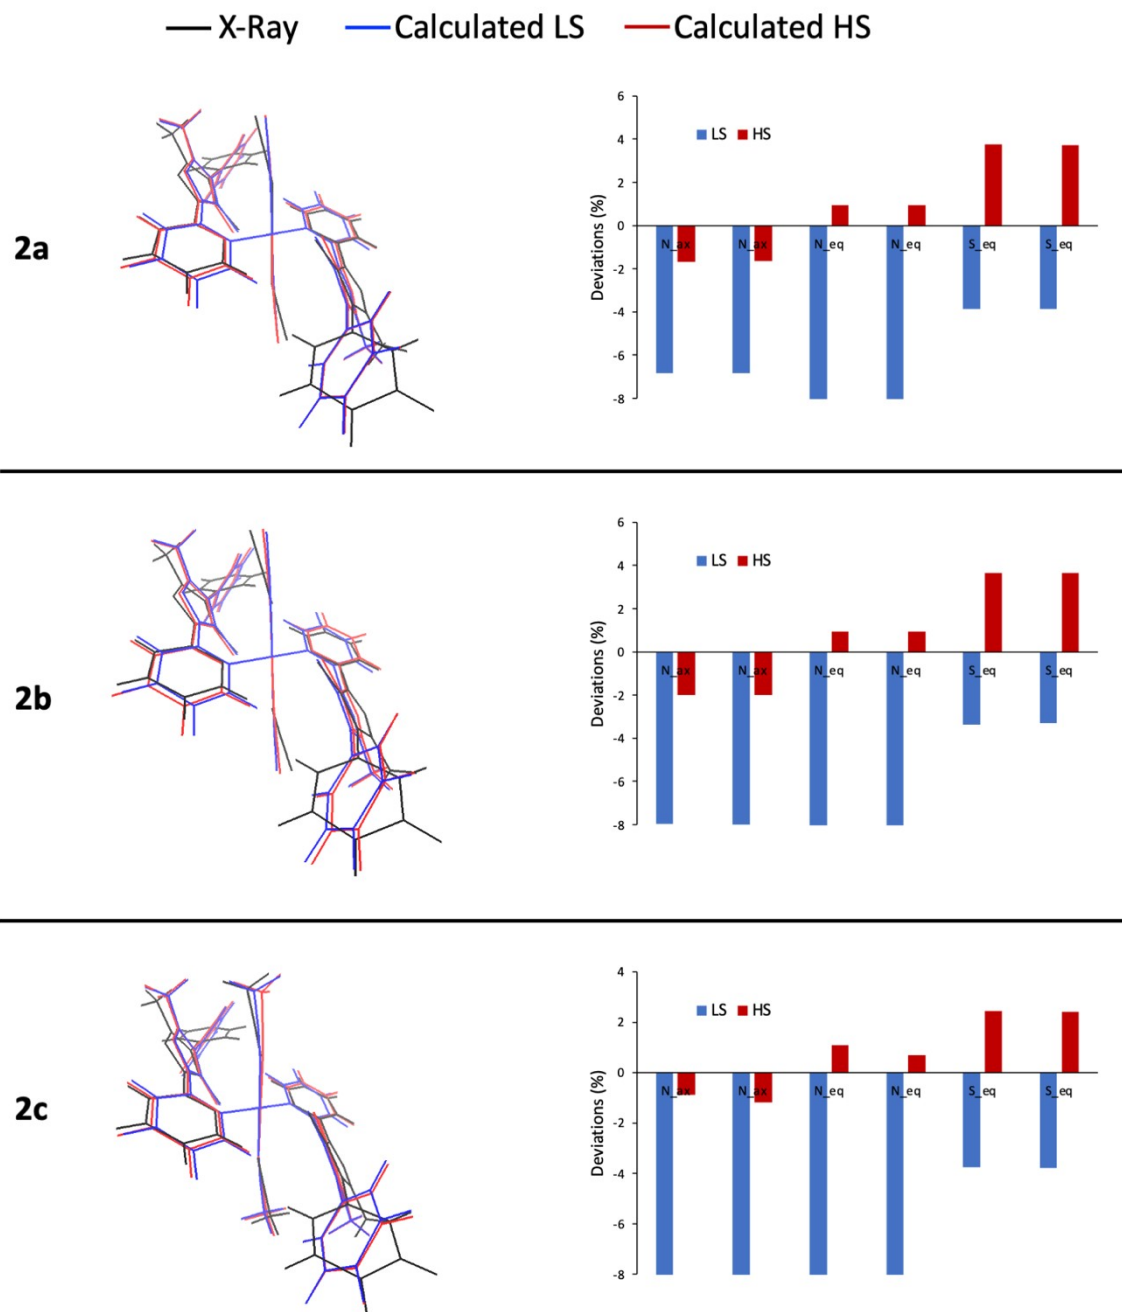

Figure S32. Left: Overlaid structures for the calculated HS-state (red), calculated LS-state (blue) and the experimental X-ray structure (black) for complexes **2a-c**. Right: Percentage deviations bar plot for the six Fe-L bond lengths for complexes **2a-c**.

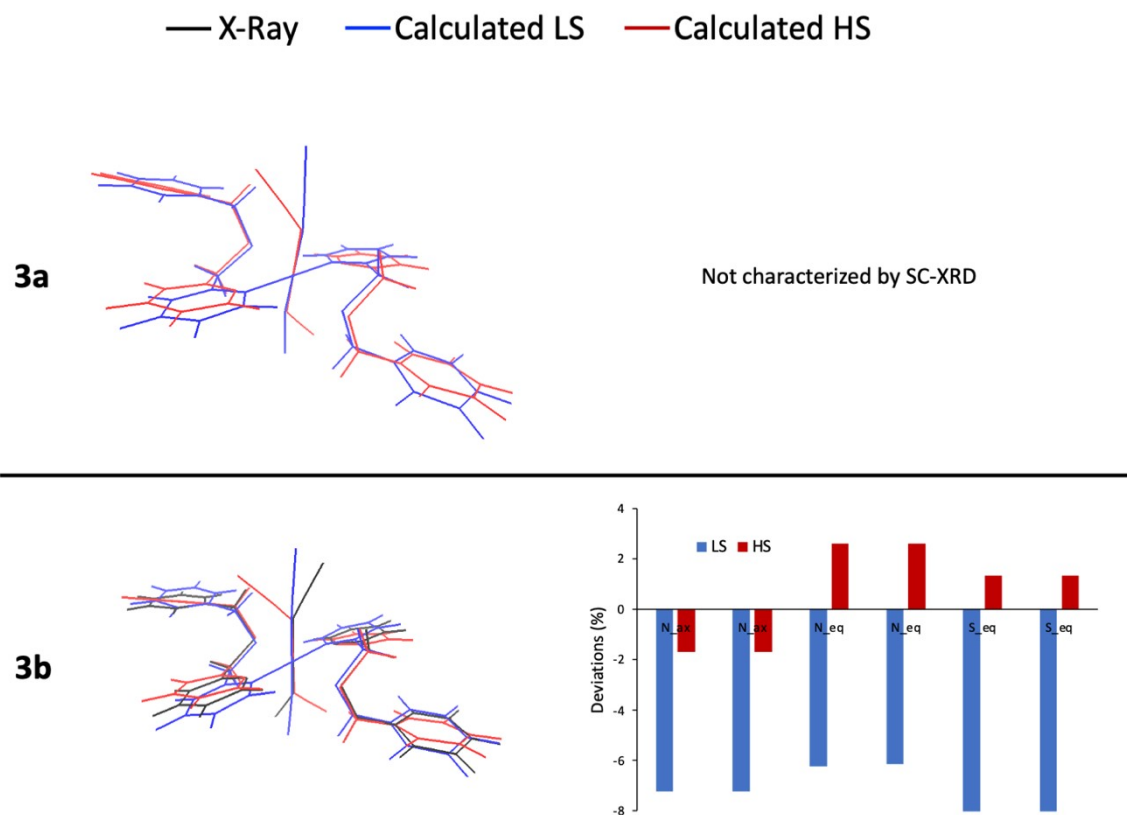

Figure S33. Left: Overlaid structures for the calculated HS-state (red), calculated LS-state (blue) and the experimental X-ray structure (black) for complexes **3a-b**. Right: Percentage deviations bar plot for the six Fe-L bond lengths for complexes **3a-b**.

Table S9. Calculated total energies, and their corresponding adiabatic energy gaps for the HS- and LS-states of the iron(II) complexes shown in Figure S30.

| Complex   | $E_{LS}$ (kcal/mol) | $E_{HS}$ (kcal/mol) | $\Delta E_{HL}$ (kcal/mol) |
|-----------|---------------------|---------------------|----------------------------|
| <b>1a</b> | -2552557.8459       | -2552577.0343       | -19.1885                   |
| <b>1b</b> | -5066880.8734       | -5066898.0968       | -17.2234                   |
| <b>2a</b> | -2862634.5534       | -2862650.0663       | -15.5129                   |
| <b>2b</b> | -5376957.4727       | -5376971.0956       | -13.6229                   |
| <b>2c</b> | -2396319.6215       | -2396332.2004       | -12.5789                   |
| <b>3a</b> | -2609458.9017       | -2609472.1131       | -13.2114                   |
| <b>3b</b> | -5123780.2019       | -5123791.9262       | -11.7243                   |

Table S10. Cartesian coordinates of the optimized structures of iron(II) complexes with their total energies and smallest vibrational frequencies.

| 1a (HS)  |            |                             |        |
|----------|------------|-----------------------------|--------|
| E (Eh) = | -4067.7910 | $\nu$ (cm <sup>-1</sup> ) = | 6.30   |
| Atom     | x          | y                           | z      |
| Fe       | 4.2595     | 7.8515                      | 3.8408 |
| C        | 6.7135     | 6.1212                      | 4.7631 |
| H        | 7.0481     | 6.6211                      | 3.8626 |
| N        | 5.4234     | 6.2706                      | 5.0604 |
| S        | 3.3799     | 8.5191                      | 6.2134 |
| N        | 3.5830     | 5.7981                      | 6.4468 |
| C        | 7.5840     | 5.3794                      | 5.5400 |
| H        | 8.6223     | 5.2928                      | 5.2512 |
| S        | 8.5544     | 9.9350                      | 4.2227 |
| C        | 2.7673     | 4.7006                      | 6.6852 |
| H        | 3.1438     | 3.6945                      | 6.6459 |
| C        | 1.5283     | 5.1725                      | 6.8812 |
| H        | 0.5995     | 4.6564                      | 7.0461 |
| N        | 1.5880     | 6.5472                      | 6.7755 |
| C        | 7.0974     | 4.7792                      | 6.6870 |
| H        | 7.7486     | 4.2022                      | 7.3315 |
| C        | 4.9672     | 5.6867                      | 6.1587 |
| C        | 5.7618     | 4.9377                      | 7.0100 |
| H        | 5.3391     | 4.5112                      | 7.9095 |
| N        | 5.9056     | 9.0711                      | 4.0921 |
| C        | 0.4331     | 7.4208                      | 6.8332 |
| H        | -0.1387    | 7.3229                      | 5.9087 |
| H        | 0.7839     | 8.4427                      | 6.9493 |
| H        | -0.1850    | 7.1434                      | 7.6858 |

|   |         |         |         |
|---|---------|---------|---------|
| C | 7.0117  | 9.4469  | 4.1636  |
| C | 2.8440  | 6.9437  | 6.4864  |
| C | 1.8058  | 9.5819  | 2.9184  |
| H | 1.4709  | 9.0820  | 3.8188  |
| N | 3.0959  | 9.4325  | 2.6213  |
| S | 5.1392  | 7.1839  | 1.4684  |
| N | 4.9365  | 9.9048  | 1.2353  |
| C | 0.9354  | 10.3239 | 2.1414  |
| H | -0.1029 | 10.4106 | 2.4300  |
| S | -0.0354 | 5.7677  | 3.4588  |
| C | 5.7525  | 11.0022 | 0.9972  |
| H | 5.3762  | 12.0085 | 1.0368  |
| C | 6.9914  | 10.5301 | 0.8010  |
| H | 7.9203  | 11.0461 | 0.6361  |
| N | 6.9314  | 9.1554  | 0.9061  |
| C | 1.4223  | 10.9241 | 0.9945  |
| H | 0.7712  | 11.5013 | 0.3499  |
| C | 3.5523  | 10.0165 | 1.5231  |
| C | 2.7579  | 10.7655 | 0.6718  |
| H | 3.1808  | 11.1921 | -0.2277 |
| N | 2.6133  | 6.6320  | 3.5894  |
| C | 8.0860  | 8.2815  | 0.8476  |
| H | 8.6573  | 8.3775  | 1.7726  |
| H | 7.7349  | 7.2599  | 0.7292  |
| H | 8.7047  | 8.5604  | -0.0040 |
| C | 1.5073  | 6.2560  | 3.5179  |
| C | 5.6753  | 8.7592  | 1.1956  |

1b (HS)

|          |            |                             |        |
|----------|------------|-----------------------------|--------|
| E (Eh) = | -8074.6172 | $\nu$ (cm <sup>-1</sup> ) = | 8.78   |
| Atom     | x          | y                           | z      |
| Se       | -0.0787    | 10.0343                     | 3.4252 |
| N        | 3.2202     | 6.3653                      | 2.6218 |
| Fe       | 4.3686     | 7.9302                      | 3.8606 |
| S        | 5.3091     | 8.5995                      | 1.5236 |
| C        | 1.9228     | 6.2243                      | 2.8925 |
| H        | 1.5704     | 6.7345                      | 3.7799 |
| N        | 5.0851     | 5.8742                      | 1.2757 |
| C        | 1.0654     | 5.4779                      | 2.1064 |
| H        | 0.0206     | 5.4021                      | 2.3736 |

|    |         |         |         |
|----|---------|---------|---------|
| C  | 1.5741  | 4.8604  | 0.9785  |
| H  | 0.9342  | 4.2784  | 0.3271  |
| N  | 7.0810  | 6.6268  | 0.9582  |
| C  | 2.9170  | 5.0086  | 0.6827  |
| H  | 3.3562  | 4.5689  | -0.2024 |
| N  | 2.7301  | 9.1735  | 3.5720  |
| C  | 3.6972  | 5.7655  | 1.5403  |
| C  | 8.2142  | 7.5269  | 0.8890  |
| H  | 8.4025  | 7.9564  | 1.8721  |
| H  | 8.0135  | 8.3206  | 0.1719  |
| H  | 9.0859  | 6.9538  | 0.5838  |
| C  | 7.1429  | 5.2536  | 0.8429  |
| H  | 8.0732  | 4.7390  | 0.6824  |
| C  | 5.9033  | 4.7790  | 1.0321  |
| H  | 5.5291  | 3.7719  | 1.0686  |
| C  | 5.8246  | 7.0192  | 1.2450  |
| C  | 1.6252  | 9.5395  | 3.5009  |
| Se | 8.8157  | 5.8265  | 4.2987  |
| N  | 5.5171  | 9.4950  | 5.0992  |
| S  | 3.4278  | 7.2612  | 6.1978  |
| C  | 6.8144  | 9.6359  | 4.8282  |
| H  | 7.1667  | 9.1255  | 3.9409  |
| N  | 3.6524  | 9.9864  | 6.4456  |
| C  | 7.6720  | 10.3825 | 5.6141  |
| H  | 8.7168  | 10.4582 | 5.3466  |
| C  | 7.1635  | 11.0001 | 6.7420  |
| H  | 7.8036  | 11.5822 | 7.3931  |
| N  | 1.6564  | 9.2342  | 6.7632  |
| C  | 5.8207  | 10.8520 | 7.0380  |
| H  | 5.3817  | 11.2919 | 7.9231  |
| N  | 6.0069  | 6.6867  | 4.1493  |
| C  | 5.0404  | 10.0950 | 6.1807  |
| C  | 0.5230  | 8.3344  | 6.8322  |
| H  | 0.3355  | 7.9041  | 5.8493  |
| H  | 0.7228  | 7.5412  | 7.5501  |
| H  | -0.3489 | 8.9080  | 7.1360  |
| C  | 1.5948  | 10.6075 | 6.8785  |
| H  | 0.6647  | 11.1223 | 7.0392  |
| C  | 2.8345  | 11.0818 | 6.6892  |
| H  | 3.2089  | 12.0888 | 6.6529  |

|          |            |                             |         |
|----------|------------|-----------------------------|---------|
| C        | 2.9127     | 8.8416                      | 6.4762  |
| C        | 7.1118     | 6.3209                      | 4.2213  |
| 2a (HS)  |            |                             |         |
| E (Eh) = | -4561.9239 | $\nu$ (cm <sup>-1</sup> ) = | 6.64    |
| Atom     | x          | y                           | z       |
| Fe       | 6.0515     | 2.0669                      | 5.9883  |
| S        | 3.6127     | 1.2296                      | 5.9253  |
| N        | 5.0718     | 4.0550                      | 6.5608  |
| C        | 5.6440     | 4.7190                      | 7.5631  |
| H        | 6.5873     | 4.3177                      | 7.9150  |
| N        | 3.3467     | 3.7996                      | 4.9944  |
| S        | 5.7881     | 3.4840                      | 1.3353  |
| C        | 5.0827     | 5.8537                      | 8.1198  |
| H        | 5.5867     | 6.3594                      | 8.9319  |
| N        | 2.9637     | 4.5145                      | 3.9503  |
| C        | 3.8777     | 6.3128                      | 7.6195  |
| H        | 3.4063     | 7.1951                      | 8.0338  |
| C        | 3.2727     | 5.6251                      | 6.5819  |
| H        | 2.3310     | 5.9392                      | 6.1555  |
| N        | 2.5525     | 3.6340                      | 3.0949  |
| C        | 3.9201     | 4.5061                      | 6.0950  |
| N        | 5.9923     | 2.5650                      | 3.9646  |
| C        | 2.1212     | 4.0930                      | 1.7853  |
| H        | 2.9889     | 4.1075                      | 1.1255  |
| H        | 1.7154     | 5.0938                      | 1.9006  |
| H        | 1.3649     | 3.4094                      | 1.4087  |
| C        | 2.6545     | 2.3602                      | 3.5399  |
| C        | 3.1850     | 2.4455                      | 4.8243  |
| C        | 2.3347     | 1.1647                      | 2.7511  |
| C        | 1.4388     | 0.2246                      | 3.2527  |
| H        | 0.9746     | 0.3897                      | 4.2171  |
| C        | 1.1595     | -0.9210                     | 2.5270  |
| H        | 0.4597     | -1.6485                     | 2.9196  |
| C        | 1.7770     | -1.1382                     | 1.3037  |
| H        | 1.5568     | -2.0356                     | 0.7378  |
| C        | 2.6830     | -0.2116                     | 0.8102  |
| H        | 3.1823     | -0.3843                     | -0.1353 |
| C        | 2.9674     | 0.9368                      | 1.5317  |
| H        | 3.7080     | 1.6433                      | 1.1696  |



|   |         |         |         |
|---|---------|---------|---------|
| C | 5.9192  | 2.9524  | 2.8653  |
| S | 8.4905  | 2.9044  | 6.0512  |
| N | 7.0316  | 0.0790  | 5.4160  |
| C | 6.4595  | -0.5851 | 4.4137  |
| H | 5.5164  | -0.1837 | 4.0614  |
| N | 8.7562  | 0.3346  | 6.9828  |
| S | 6.3123  | 0.6534  | 10.6431 |
| C | 7.0209  | -1.7200 | 3.8574  |
| H | 6.5170  | -2.2259 | 3.0453  |
| N | 9.1383  | -0.3800 | 8.0274  |
| C | 8.2257  | -2.1792 | 4.3582  |
| H | 8.6970  | -3.0617 | 3.9443  |
| C | 8.8304  | -1.4913 | 5.3958  |
| H | 9.7719  | -1.8054 | 5.8226  |
| N | 9.5488  | 0.5007  | 8.8829  |
| C | 8.1830  | -0.3721 | 5.8822  |
| N | 6.1108  | 1.5684  | 8.0121  |
| C | 9.9792  | 0.0420  | 10.1929 |
| H | 9.1118  | 0.0312  | 10.8533 |
| H | 10.3811 | -0.9604 | 10.0786 |
| H | 10.7382 | 0.7233  | 10.5683 |
| C | 9.4473  | 1.7744  | 8.4375  |
| C | 8.9177  | 1.6888  | 7.1528  |
| C | 9.7670  | 2.9701  | 9.2259  |
| C | 10.6629 | 3.9101  | 8.7238  |
| H | 11.1270 | 3.7446  | 7.7595  |
| C | 10.9424 | 5.0559  | 9.4492  |
| H | 11.6422 | 5.7832  | 9.0563  |
| C | 10.3250 | 5.2736  | 10.6725 |
| H | 10.5453 | 6.1711  | 11.2381 |
| C | 9.4190  | 4.3472  | 11.1664 |
| H | 8.9198  | 4.5203  | 12.1120 |
| C | 9.1345  | 3.1985  | 10.4454 |
| H | 8.3937  | 2.4924  | 10.8078 |
| C | 6.1826  | 1.1830  | 9.1122  |

2b (HS)

|          |            |                             |        |
|----------|------------|-----------------------------|--------|
| E (Eh) = | -8568.7500 | $\nu$ (cm <sup>-1</sup> ) = | 9.97   |
| Atom     | x          | y                           | z      |
| Se       | 2.3387     | 0.8209                      | 1.2070 |

|    |         |         |         |
|----|---------|---------|---------|
| S  | 4.4154  | 3.2550  | 5.8962  |
| Fe | 2.0500  | 2.2846  | 6.0235  |
| C  | 2.6382  | -0.2914 | 7.6780  |
| H  | 1.6880  | 0.0730  | 8.0502  |
| N  | 3.1476  | 0.3769  | 6.6441  |
| N  | 4.8221  | 0.6798  | 5.0283  |
| C  | 3.2676  | -1.3870 | 8.2402  |
| H  | 2.8116  | -1.8970 | 9.0776  |
| N  | 5.2557  | -0.0379 | 4.0066  |
| C  | 4.4771  | -1.8018 | 7.7115  |
| H  | 5.0017  | -2.6526 | 8.1278  |
| C  | 5.0180  | -1.1085 | 6.6430  |
| H  | 5.9607  | -1.3860 | 6.1940  |
| N  | 5.6379  | 0.8419  | 3.1374  |
| C  | 6.1133  | 0.3753  | 1.8458  |
| H  | 5.2660  | 0.3453  | 1.1596  |
| H  | 6.8755  | 1.0614  | 1.4854  |
| H  | 6.5221  | -0.6212 | 1.9847  |
| C  | 4.3053  | -0.0307 | 6.1534  |
| N  | 2.1114  | 1.7363  | 3.9984  |
| C  | 4.9193  | 2.0363  | 4.8284  |
| C  | 5.4685  | 2.1194  | 3.5517  |
| C  | 6.6259  | 4.2844  | 3.2786  |
| H  | 7.0494  | 4.1471  | 4.2658  |
| C  | 6.9087  | 5.4251  | 2.5470  |
| H  | 7.5677  | 6.1785  | 2.9605  |
| C  | 6.3449  | 5.6041  | 1.2917  |
| H  | 6.5669  | 6.4981  | 0.7210  |
| C  | 5.4887  | 4.6444  | 0.7731  |
| H  | 5.0311  | 4.7882  | -0.1980 |
| C  | 5.1994  | 3.5012  | 1.5015  |
| H  | 4.4938  | 2.7708  | 1.1172  |
| C  | 2.1896  | 1.3712  | 2.8963  |
| C  | 5.7794  | 3.3113  | 2.7533  |
| Se | 1.7628  | 3.7430  | 10.8420 |
| S  | -0.3153 | 1.3141  | 6.1506  |
| C  | 1.4611  | 4.8612  | 4.3698  |
| H  | 2.4111  | 4.4968  | 3.9970  |
| N  | 0.9521  | 4.1924  | 5.4036  |
| N  | -0.7217 | 3.8888  | 7.0200  |

|   |         |         |         |
|---|---------|---------|---------|
| C | 0.8316  | 5.9573  | 3.8085  |
| H | 1.2873  | 6.4677  | 2.9712  |
| N | -1.1548 | 4.6060  | 8.0423  |
| C | -0.3776 | 6.3719  | 4.3380  |
| H | -0.9022 | 7.2230  | 3.9225  |
| C | -0.9181 | 5.6782  | 5.4064  |
| H | -1.8605 | 5.9555  | 5.8560  |
| N | -1.5368 | 3.7257  | 8.9111  |
| C | -2.0116 | 4.1916  | 10.2032 |
| H | -1.1640 | 4.2207  | 10.8891 |
| H | -2.7740 | 3.5055  | 10.5634 |
| H | -2.4199 | 5.1884  | 10.0652 |
| C | -0.2053 | 4.6000  | 5.8951  |
| N | 1.9887  | 2.8338  | 8.0485  |
| C | -0.8190 | 2.5323  | 7.2191  |
| C | -1.3677 | 2.4484  | 8.4960  |
| C | -2.5256 | 0.2835  | 8.7678  |
| H | -2.9492 | 0.4216  | 7.7808  |
| C | -2.8085 | -0.8577 | 9.4986  |
| H | -3.4677 | -1.6107 | 9.0846  |
| C | -2.2445 | -1.0377 | 10.7537 |
| H | -2.4666 | -1.9320 | 11.3237 |
| C | -1.3880 | -0.0786 | 11.2728 |
| H | -0.9303 | -0.2232 | 12.2438 |
| C | -1.0986 | 1.0652  | 10.5452 |
| H | -0.3928 | 1.7951  | 10.9300 |
| C | 1.9107  | 3.1958  | 9.1515  |
| C | -1.6787 | 1.2560  | 9.2936  |

2c (HS)

|          |            |                             |        |
|----------|------------|-----------------------------|--------|
| E (Eh) = | -3818.7989 | $\nu$ (cm <sup>-1</sup> ) = | 12.26  |
| Atom     | x          | y                           | z      |
| Fe       | 6.0626     | 2.1085                      | 6.0042 |
| S        | 3.6785     | 1.2506                      | 5.8502 |
| N        | 5.0642     | 4.0811                      | 6.5491 |
| C        | 5.6174     | 4.7498                      | 7.5603 |
| H        | 6.5474     | 4.3434                      | 7.9401 |
| N        | 3.3659     | 3.8298                      | 4.9468 |
| C        | 5.0577     | 5.8974                      | 8.0898 |
| H        | 5.5475     | 6.4047                      | 8.9094 |

|   |        |         |         |
|---|--------|---------|---------|
| N | 2.9313 | 4.5467  | 3.9241  |
| C | 3.8735 | 6.3674  | 7.5514  |
| H | 3.4036 | 7.2610  | 7.9423  |
| C | 3.2871 | 5.6757  | 6.5063  |
| H | 2.3614 | 5.9977  | 6.0521  |
| N | 2.4989 | 3.6673  | 3.0783  |
| C | 3.9303 | 4.5414  | 6.0481  |
| N | 6.0582 | 2.6040  | 3.9438  |
| C | 1.9737 | 4.1275  | 1.8032  |
| H | 2.7555 | 4.0429  | 1.0498  |
| H | 1.6815 | 5.1660  | 1.9262  |
| H | 1.1184 | 3.5120  | 1.5352  |
| C | 2.6363 | 2.3917  | 3.5076  |
| C | 3.2140 | 2.4747  | 4.7707  |
| C | 2.2871 | 1.2039  | 2.7191  |
| C | 1.3910 | 0.2697  | 3.2314  |
| H | 0.9495 | 0.4299  | 4.2073  |
| C | 1.0815 | -0.8640 | 2.4992  |
| H | 0.3818 | -1.5876 | 2.8990  |
| C | 1.6689 | -1.0742 | 1.2598  |
| H | 1.4253 | -1.9625 | 0.6893  |
| C | 2.5748 | -0.1532 | 0.7560  |
| H | 3.0523 | -0.3205 | -0.2017 |
| C | 2.8883 | 0.9843  | 1.4826  |
| H | 3.6286 | 1.6825  | 1.1073  |
| C | 5.9934 | 2.8465  | 2.8174  |
| S | 8.4428 | 2.9757  | 6.1522  |
| N | 7.0739 | 0.1356  | 5.4483  |
| C | 6.5256 | -0.5325 | 4.4343  |
| H | 5.5876 | -0.1376 | 4.0624  |
| N | 8.7728 | 0.3971  | 7.0463  |
| C | 7.1023 | -1.6642 | 3.8889  |
| H | 6.6165 | -2.1702 | 3.0661  |
| N | 9.1830 | -0.3211 | 8.0764  |
| C | 8.2985 | -2.1184 | 4.4138  |
| H | 8.7818 | -2.9989 | 4.0096  |
| C | 8.8794 | -1.4278 | 5.4630  |
| H | 9.8131 | -1.7383 | 5.9090  |
| N | 9.5809 | 0.5553  | 8.9409  |
| C | 8.2189 | -0.3108 | 5.9366  |

|   |         |         |         |
|---|---------|---------|---------|
| N | 6.0627  | 1.5574  | 8.0571  |
| C | 10.0374 | 0.0887  | 10.2408 |
| H | 9.1805  | 0.0473  | 10.9125 |
| H | 10.4575 | -0.9039 | 10.1079 |
| H | 10.7883 | 0.7806  | 10.6133 |
| C | 9.4471  | 1.8335  | 8.5127  |
| C | 8.9061  | 1.7516  | 7.2346  |
| C | 9.7661  | 3.0261  | 9.3064  |
| C | 10.6412 | 3.9809  | 8.7958  |
| H | 11.0884 | 3.8300  | 7.8211  |
| C | 10.9244 | 5.1217  | 9.5276  |
| H | 11.6091 | 5.8597  | 9.1285  |
| C | 10.3318 | 5.3193  | 10.7665 |
| H | 10.5558 | 6.2123  | 11.3377 |
| C | 9.4470  | 4.3777  | 11.2698 |
| H | 8.9686  | 4.5337  | 12.2290 |
| C | 9.1594  | 3.2341  | 10.5421 |
| H | 8.4401  | 2.5135  | 10.9159 |
| C | 6.1682  | 1.0583  | 9.0928  |
| B | 5.8602  | 3.1589  | 1.2773  |
| H | 6.7849  | 3.8668  | 0.9454  |
| H | 5.8695  | 2.0912  | 0.6920  |
| B | 6.3746  | 0.3388  | 10.4824 |
| H | 7.0165  | -0.6725 | 10.2534 |
| H | 6.9937  | 1.0981  | 11.2112 |
| H | 4.7939  | 3.7345  | 1.1212  |
| H | 5.2884  | 0.0785  | 10.9502 |

3a (HS)

|          |            |                             |         |
|----------|------------|-----------------------------|---------|
| E (Eh) = | -4158.4591 | $\nu$ (cm <sup>-1</sup> ) = | 18.12   |
| Atom     | x          | y                           | z       |
| S        | 6.1538     | 6.0501                      | 8.0918  |
| Fe       | 10.1511    | 3.8540                      | 8.6731  |
| N        | 9.1214     | 4.4005                      | 10.5961 |
| C        | 8.8839     | 5.6732                      | 10.9056 |
| H        | 9.3043     | 6.4126                      | 10.2339 |
| N        | 8.6254     | 4.8301                      | 7.6980  |
| C        | 8.1261     | 6.0505                      | 11.9976 |
| H        | 7.9487     | 7.0982                      | 12.1972 |
| S        | 8.7289     | 1.6832                      | 9.2090  |

|   |         |         |         |
|---|---------|---------|---------|
| C | 8.8781  | 2.0102  | 10.9749 |
| H | 9.9167  | 1.7619  | 11.2024 |
| H | 8.2266  | 1.3336  | 11.5267 |
| C | 8.5999  | 3.4380  | 11.3593 |
| C | 7.5890  | 5.0572  | 12.7968 |
| H | 6.9779  | 5.3083  | 13.6551 |
| C | 7.8260  | 3.7336  | 12.4717 |
| H | 7.3990  | 2.9288  | 13.0561 |
| C | 6.9978  | 2.1253  | 8.8925  |
| H | 6.8939  | 3.2077  | 8.9351  |
| H | 6.8353  | 1.8290  | 7.8547  |
| C | 7.5845  | 5.3584  | 7.8449  |
| C | 5.9078  | 0.0852  | 9.9192  |
| H | 6.5487  | -0.5454 | 9.3125  |
| C | 6.0154  | 1.4697  | 9.8216  |
| C | 5.1926  | 2.2664  | 10.6090 |
| H | 5.2674  | 3.3458  | 10.5284 |
| C | 4.9961  | -0.4888 | 10.7890 |
| H | 4.9202  | -1.5676 | 10.8544 |
| C | 4.2774  | 1.6927  | 11.4803 |
| H | 3.6392  | 2.3268  | 12.0841 |
| C | 4.1791  | 0.3139  | 11.5743 |
| H | 3.4657  | -0.1366 | 12.2537 |
| S | 14.1502 | 1.6613  | 9.2529  |
| N | 11.1824 | 3.3084  | 6.7505  |
| C | 11.4208 | 2.0360  | 6.4406  |
| H | 10.9984 | 1.2960  | 7.1104  |
| N | 11.6766 | 2.8769  | 9.6484  |
| C | 12.1818 | 1.6595  | 5.3506  |
| H | 12.3598 | 0.6120  | 5.1506  |
| S | 11.5728 | 6.0242  | 8.1407  |
| C | 11.4264 | 5.6990  | 6.3742  |
| H | 10.3879 | 5.9467  | 6.1454  |
| H | 12.0783 | 6.3764  | 5.8241  |
| C | 11.7061 | 4.2715  | 5.9895  |
| C | 12.7214 | 2.6535  | 4.5538  |
| H | 13.3351 | 2.4031  | 3.6972  |
| C | 12.4833 | 3.9769  | 4.8793  |
| H | 12.9120 | 4.7821  | 4.2968  |
| C | 13.3037 | 5.5832  | 8.4586  |

|   |         |        |        |
|---|---------|--------|--------|
| H | 13.4095 | 4.5011 | 8.4111 |
| H | 13.4637 | 5.8750 | 9.4980 |
| C | 12.7187 | 2.3510 | 9.5010 |
| C | 14.3919 | 7.6297 | 7.4423 |
| H | 13.7478 | 8.2568 | 8.0493 |
| C | 14.2872 | 6.2445 | 7.5345 |
| C | 15.1142 | 5.4527 | 6.7467 |
| H | 15.0415 | 4.3728 | 6.8231 |
| C | 15.3053 | 8.2090 | 6.5779 |
| H | 15.3790 | 9.2882 | 6.5169 |
| C | 16.0311 | 6.0317 | 5.8807 |
| H | 16.6725 | 5.4011 | 5.2766 |
| C | 16.1267 | 7.4110 | 5.7923 |
| H | 16.8414 | 7.8658 | 5.1171 |

3b (HS)

|          |            |                             |         |
|----------|------------|-----------------------------|---------|
| E (Eh) = | -8165.2833 | $\nu$ (cm <sup>-1</sup> ) = | 17.71   |
| Atom     | x          | y                           | z       |
| Fe       | 10.1525    | 3.8563                      | 8.6765  |
| N        | 9.1398     | 4.4111                      | 10.5943 |
| C        | 8.9241     | 5.6854                      | 10.9135 |
| H        | 9.3661     | 6.4235                      | 10.2543 |
| N        | 8.6224     | 4.8524                      | 7.7032  |
| C        | 8.1630     | 6.0683                      | 12.0011 |
| H        | 8.0059     | 7.1177                      | 12.2081 |
| S        | 8.7306     | 1.6989                      | 9.1938  |
| C        | 8.8621     | 2.0225                      | 10.9620 |
| H        | 9.8951     | 1.7634                      | 11.2025 |
| H        | 8.1982     | 1.3493                      | 11.5029 |
| C        | 8.5935     | 3.4523                      | 11.3462 |
| C        | 7.5948     | 5.0792                      | 12.7833 |
| H        | 6.9780     | 5.3350                      | 13.6361 |
| C        | 7.8095     | 3.7534                      | 12.4492 |
| H        | 7.3619     | 2.9523                      | 13.0232 |
| C        | 6.9963     | 2.1237                      | 8.8646  |
| H        | 6.8798     | 3.2054                      | 8.8964  |
| H        | 6.8408     | 1.8126                      | 7.8302  |
| C        | 7.6002     | 5.3962                      | 7.8826  |
| C        | 5.9445     | 0.0804                      | 9.9226  |
| H        | 6.6025     | -0.5470                     | 9.3309  |

|    |         |         |         |
|----|---------|---------|---------|
| C  | 6.0214  | 1.4651  | 9.7998  |
| C  | 5.1783  | 2.2587  | 10.5687 |
| H  | 5.2287  | 3.3380  | 10.4673 |
| C  | 5.0446  | -0.4981 | 10.8016 |
| H  | 4.9939  | -1.5769 | 10.8878 |
| C  | 4.2745  | 1.6797  | 11.4489 |
| H  | 3.6198  | 2.3103  | 12.0385 |
| C  | 4.2079  | 0.3011  | 11.5698 |
| H  | 3.5039  | -0.1524 | 12.2570 |
| N  | 11.1651 | 3.3016  | 6.7588  |
| C  | 11.3808 | 2.0273  | 6.4395  |
| H  | 10.9389 | 1.2892  | 7.0987  |
| N  | 11.6825 | 2.8601  | 9.6498  |
| C  | 12.1418 | 1.6444  | 5.3518  |
| H  | 12.2989 | 0.5950  | 5.1448  |
| S  | 11.5744 | 6.0138  | 8.1593  |
| C  | 11.4428 | 5.6902  | 6.3910  |
| H  | 10.4097 | 5.9493  | 6.1506  |
| H  | 12.1066 | 6.3634  | 5.8501  |
| C  | 11.7114 | 4.2604  | 6.0068  |
| C  | 12.7099 | 2.6336  | 4.5696  |
| H  | 13.3266 | 2.3778  | 3.7167  |
| C  | 12.4952 | 3.9593  | 4.9037  |
| H  | 12.9427 | 4.7604  | 4.3297  |
| C  | 13.3087 | 5.5891  | 8.4884  |
| H  | 13.4252 | 4.5075  | 8.4561  |
| H  | 13.4639 | 5.8997  | 9.5231  |
| C  | 12.7048 | 2.3165  | 9.4705  |
| C  | 14.3603 | 7.6330  | 7.4316  |
| H  | 13.7021 | 8.2600  | 8.0234  |
| C  | 14.2836 | 6.2482  | 7.5538  |
| C  | 15.1270 | 5.4552  | 6.7846  |
| H  | 15.0768 | 4.3758  | 6.8855  |
| C  | 15.2603 | 8.2121  | 6.5530  |
| H  | 15.3107 | 9.2910  | 6.4673  |
| C  | 16.0308 | 6.0347  | 5.9049  |
| H  | 16.6858 | 5.4045  | 5.3151  |
| C  | 16.0972 | 7.4133  | 5.7846  |
| H  | 16.8013 | 7.8673  | 5.0978  |
| Se | 6.0557  | 6.1726  | 8.2330  |



Se                                    14.2490                                    1.5398                                    9.1199

1a (LS)

| E (Eh) = | -4067.7604 | $\nu$ (cm <sup>-1</sup> ) = | 26.21  |
|----------|------------|-----------------------------|--------|
| Atom     | x          | y                           | z      |
| Fe       | 4.2596     | 7.8513                      | 3.8406 |
| C        | 6.6511     | 6.3246                      | 4.6261 |
| H        | 6.9890     | 6.8897                      | 3.7713 |
| N        | 5.3551     | 6.4597                      | 4.9277 |
| S        | 3.3670     | 8.5735                      | 5.9572 |
| N        | 3.5406     | 5.8858                      | 6.3245 |
| C        | 7.5211     | 5.5233                      | 5.3378 |
| H        | 8.5575     | 5.4661                      | 5.0359 |
| S        | 8.3571     | 10.1707                     | 4.2399 |
| C        | 2.7369     | 4.8004                      | 6.6431 |
| H        | 3.1042     | 3.7907                      | 6.6174 |
| C        | 1.5101     | 5.2846                      | 6.8788 |
| H        | 0.5880     | 4.7780                      | 7.1004 |
| N        | 1.5659     | 6.6548                      | 6.7132 |
| C        | 7.0426     | 4.8331                      | 6.4351 |
| H        | 7.6942     | 4.2098                      | 7.0343 |
| C        | 4.9085     | 5.7860                      | 5.9851 |
| C        | 5.7104     | 4.9733                      | 6.7699 |
| H        | 5.2899     | 4.4882                      | 7.6399 |
| N        | 5.7840     | 9.0894                      | 4.1063 |
| C        | 0.4052     | 7.5227                      | 6.7396 |
| H        | -0.2367    | 7.2767                      | 5.8918 |
| H        | 0.7479     | 8.5512                      | 6.6638 |
| H        | -0.1335    | 7.3844                      | 7.6759 |
| C        | 6.8467     | 9.5637                      | 4.1769 |
| C        | 2.8056     | 7.0285                      | 6.3499 |
| C        | 1.8679     | 9.3781                      | 3.0548 |
| H        | 1.5299     | 8.8128                      | 3.9094 |
| N        | 3.1640     | 9.2431                      | 2.7534 |
| S        | 5.1523     | 7.1295                      | 1.7239 |
| N        | 4.9788     | 9.8172                      | 1.3570 |
| C        | 0.9981     | 10.1795                     | 2.3430 |
| H        | -0.0384    | 10.2366                     | 2.6446 |
| S        | 0.1622     | 5.5316                      | 3.4421 |
| C        | 5.7825     | 10.9026                     | 1.0387 |

|   |        |         |        |
|---|--------|---------|--------|
| H | 5.4153 | 11.9124 | 1.0646 |
| C | 7.0095 | 10.4185 | 0.8034 |
| H | 7.9316 | 10.9252 | 0.5822 |
| N | 6.9536 | 9.0483  | 0.9689 |
| C | 1.4768 | 10.8699 | 1.2459 |
| H | 0.8253 | 11.4933 | 0.6467 |
| C | 3.6109 | 9.9170  | 1.6962 |
| C | 2.8091 | 10.7298 | 0.9114 |
| H | 3.2298 | 11.2151 | 0.0415 |
| N | 2.7352 | 6.6131  | 3.5749 |
| C | 8.1144 | 8.1804  | 0.9429 |
| H | 8.7562 | 8.4268  | 1.7906 |
| H | 7.7716 | 7.1519  | 1.0192 |
| H | 8.6530 | 8.3181  | 0.0065 |
| C | 1.6725 | 6.1387  | 3.5047 |
| C | 5.7137 | 8.6745  | 1.3315 |

1b (LS)

|          |            |                             |        |
|----------|------------|-----------------------------|--------|
| E (Eh) = | -8074.5897 | $\nu$ (cm <sup>-1</sup> ) = | 19.48  |
| Atom     | x          | y                           | z      |
| Se       | 0.1272     | 10.2703                     | 3.3362 |
| N        | 3.2941     | 6.5289                      | 2.7650 |
| Fe       | 4.3687     | 7.9299                      | 3.8611 |
| S        | 5.3020     | 8.6373                      | 1.7615 |
| C        | 1.9914     | 6.3972                      | 3.0396 |
| H        | 1.6359     | 6.9626                      | 3.8870 |
| N        | 5.1365     | 5.9476                      | 1.4073 |
| C        | 1.1340     | 5.5992                      | 2.3091 |
| H        | 0.0908     | 5.5478                      | 2.5876 |
| C        | 1.6340     | 4.9064                      | 1.2235 |
| H        | 0.9930     | 4.2854                      | 0.6106 |
| N        | 7.1114     | 6.7190                      | 1.0238 |
| C        | 2.9741     | 5.0403                      | 0.9185 |
| H        | 3.4116     | 4.5516                      | 0.0590 |
| N        | 2.8491     | 9.1595                      | 3.5541 |
| C        | 3.7617     | 5.8514                      | 1.7187 |
| C        | 8.2694     | 7.5909                      | 0.9877 |
| H        | 8.9201     | 7.3457                      | 1.8292 |
| H        | 7.9240     | 8.6182                      | 1.0674 |
| H        | 8.7993     | 7.4551                      | 0.0461 |

|    |         |         |        |
|----|---------|---------|--------|
| C  | 7.1708  | 5.3480  | 0.8655 |
| H  | 8.0956  | 4.8420  | 0.6537 |
| C  | 5.9436  | 4.8623  | 1.0972 |
| H  | 5.5785  | 3.8519  | 1.1276 |
| C  | 5.8694  | 7.0913  | 1.3789 |
| C  | 1.7921  | 9.6300  | 3.4487 |
| Se | 8.6114  | 5.5910  | 4.3831 |
| N  | 5.4434  | 9.3317  | 4.9570 |
| S  | 3.4357  | 7.2232  | 5.9602 |
| C  | 6.7460  | 9.4638  | 4.6823 |
| H  | 7.1015  | 8.8984  | 3.8348 |
| N  | 3.6010  | 9.9127  | 6.3149 |
| C  | 7.6033  | 10.2619 | 5.4126 |
| H  | 8.6464  | 10.3137 | 5.1340 |
| C  | 7.1034  | 10.9545 | 6.4985 |
| H  | 7.7443  | 11.5756 | 7.1113 |
| N  | 1.6256  | 9.1416  | 6.6965 |
| C  | 5.7633  | 10.8203 | 6.8036 |
| H  | 5.3258  | 11.3088 | 7.6632 |
| N  | 5.8889  | 6.7011  | 4.1686 |
| C  | 4.9758  | 10.0091 | 6.0034 |
| C  | 0.4677  | 8.2697  | 6.7320 |
| H  | -0.1841 | 8.5169  | 5.8920 |
| H  | 0.8128  | 7.2427  | 6.6493 |
| H  | -0.0611 | 8.4033  | 7.6746 |
| C  | 1.5662  | 10.5126 | 6.8545 |
| H  | 0.6413  | 11.0186 | 7.0656 |
| C  | 2.7937  | 10.9982 | 6.6239 |
| H  | 3.1588  | 12.0086 | 6.5935 |
| C  | 2.8680  | 8.7692  | 6.3427 |
| C  | 6.9462  | 6.2309  | 4.2728 |

2a (LS)

|          |            |                             |        |
|----------|------------|-----------------------------|--------|
| E (Eh) = | -4561.8991 | $\nu$ (cm <sup>-1</sup> ) = | 18.32  |
| Atom     | x          | y                           | z      |
| Fe       | 6.0521     | 2.0677                      | 5.9886 |
| S        | 3.8379     | 1.1758                      | 5.8765 |
| N        | 5.1817     | 3.8404                      | 6.5986 |
| C        | 5.7373     | 4.4721                      | 7.6373 |
| H        | 6.6209     | 4.0059                      | 8.0473 |

|   |        |         |         |
|---|--------|---------|---------|
| N | 3.4743 | 3.7182  | 4.9789  |
| S | 5.8039 | 3.4614  | 1.4322  |
| C | 5.2411 | 5.6520  | 8.1560  |
| H | 5.7418 | 6.1152  | 8.9950  |
| N | 3.0476 | 4.4466  | 3.9651  |
| C | 4.1124 | 6.2106  | 7.5878  |
| H | 3.6932 | 7.1332  | 7.9689  |
| C | 3.5131 | 5.5585  | 6.5275  |
| H | 2.6207 | 5.9359  | 6.0503  |
| N | 2.5881 | 3.5793  | 3.1213  |
| C | 4.0876 | 4.3851  | 6.0772  |
| N | 6.0161 | 2.6524  | 4.1022  |
| C | 2.1266 | 4.0523  | 1.8276  |
| H | 2.9827 | 4.0757  | 1.1522  |
| H | 1.7221 | 5.0513  | 1.9614  |
| H | 1.3639 | 3.3715  | 1.4593  |
| C | 2.7046 | 2.2977  | 3.5472  |
| C | 3.3008 | 2.3712  | 4.7987  |
| C | 2.3649 | 1.1107  | 2.7534  |
| C | 1.4711 | 0.1701  | 3.2564  |
| H | 1.0128 | 0.3309  | 4.2245  |
| C | 1.1833 | -0.9704 | 2.5254  |
| H | 0.4854 | -1.6993 | 2.9186  |
| C | 1.7896 | -1.1798 | 1.2953  |
| H | 1.5625 | -2.0726 | 0.7250  |
| C | 2.6942 | -0.2522 | 0.8005  |
| H | 3.1855 | -0.4202 | -0.1502 |
| C | 2.9881 | 0.8902  | 1.5273  |
| H | 3.7303 | 1.5975  | 1.1688  |
| C | 5.9453 | 2.9915  | 2.9910  |
| S | 8.2666 | 2.9593  | 6.1005  |
| N | 6.9220 | 0.2950  | 5.3781  |
| C | 6.3658 | -0.3366 | 4.3399  |
| H | 5.4822 | 0.1299  | 3.9302  |
| N | 8.6302 | 0.4165  | 6.9971  |
| S | 6.2965 | 0.6764  | 10.5460 |
| C | 6.8613 | -1.5168 | 3.8210  |
| H | 6.3599 | -1.9798 | 2.9824  |
| N | 9.0571 | -0.3123 | 8.0105  |
| C | 7.9901 | -2.0756 | 4.3886  |

|   |         |         |         |
|---|---------|---------|---------|
| H | 8.4087  | -2.9984 | 4.0073  |
| C | 8.5901  | -1.4236 | 5.4484  |
| H | 9.4826  | -1.8013 | 5.9252  |
| N | 9.5165  | 0.5546  | 8.8548  |
| C | 8.0163  | -0.2500 | 5.8989  |
| N | 6.0879  | 1.4834  | 7.8752  |
| C | 9.9782  | 0.0808  | 10.1480 |
| H | 9.1214  | 0.0532  | 10.8226 |
| H | 10.3870 | -0.9163 | 10.0129 |
| H | 10.7379 | 0.7640  | 10.5186 |
| C | 9.3995  | 1.8364  | 8.4295  |
| C | 8.8040  | 1.7634  | 7.1776  |
| C | 9.7372  | 3.0232  | 9.2244  |
| C | 10.6293 | 3.9658  | 8.7221  |
| H | 11.0880 | 3.8066  | 7.7538  |
| C | 10.9147 | 5.1064  | 9.4540  |
| H | 11.6110 | 5.8369  | 9.0615  |
| C | 10.3075 | 5.3141  | 10.6838 |
| H | 10.5324 | 6.2072  | 11.2545 |
| C | 9.4048  | 4.3843  | 11.1781 |
| H | 8.9128  | 4.5508  | 12.1286 |
| C | 9.1133  | 3.2416  | 10.4506 |
| H | 8.3724  | 2.5328  | 10.8084 |
| C | 6.1573  | 1.1454  | 8.9868  |

2b (LS)

|          |            |                             |        |
|----------|------------|-----------------------------|--------|
| E (Eh) = | -8568.7283 | $\nu$ (cm <sup>-1</sup> ) = | 14.89  |
| Atom     | x          | y                           | z      |
| Se       | 2.1957     | 0.8592                      | 1.3144 |
| S        | 4.2323     | 3.2341                      | 5.8662 |
| Fe       | 2.0484     | 2.2845                      | 6.0226 |
| C        | 2.4546     | -0.1033                     | 7.6707 |
| H        | 1.5620     | 0.3370                      | 8.0899 |
| N        | 2.9751     | 0.5372                      | 6.6193 |
| N        | 4.6542     | 0.6988                      | 4.9735 |
| C        | 2.9952     | -1.2619                     | 8.1925 |
| H        | 2.5213     | -1.7317                     | 9.0432 |
| N        | 5.0982     | -0.0214                     | 3.9615 |
| C        | 4.1326     | -1.7898                     | 7.6124 |
| H        | 4.5863     | -2.6947                     | 7.9960 |

|    |         |         |         |
|----|---------|---------|---------|
| C  | 4.6944  | -1.1297 | 6.5363  |
| H  | 5.5907  | -1.4835 | 6.0485  |
| N  | 5.5328  | 0.8548  | 3.1133  |
| C  | 6.0123  | 0.3894  | 1.8232  |
| H  | 5.1608  | 0.3444  | 1.1424  |
| H  | 6.7614  | 1.0869  | 1.4578  |
| H  | 6.4383  | -0.5998 | 1.9619  |
| C  | 4.0770  | 0.0212  | 6.0849  |
| N  | 2.0573  | 1.6966  | 4.1417  |
| C  | 4.7916  | 2.0491  | 4.7877  |
| C  | 5.3814  | 2.1347  | 3.5341  |
| C  | 6.5550  | 4.2959  | 3.2597  |
| H  | 7.0027  | 4.1487  | 4.2349  |
| C  | 6.8211  | 5.4447  | 2.5337  |
| H  | 7.4911  | 6.1932  | 2.9380  |
| C  | 6.2286  | 5.6369  | 1.2940  |
| H  | 6.4375  | 6.5366  | 0.7276  |
| C  | 5.3601  | 4.6832  | 0.7847  |
| H  | 4.8793  | 4.8368  | -0.1737 |
| C  | 5.0883  | 3.5321  | 1.5063  |
| H  | 4.3720  | 2.8050  | 1.1350  |
| C  | 2.0917  | 1.3621  | 3.0313  |
| C  | 5.6973  | 3.3295  | 2.7425  |
| Se | 1.9151  | 3.7065  | 10.7323 |
| S  | -0.1373 | 1.3354  | 6.1794  |
| C  | 1.6398  | 4.6712  | 4.3733  |
| H  | 2.5313  | 4.2303  | 3.9524  |
| N  | 1.1214  | 4.0315  | 5.4261  |
| N  | -0.5545 | 3.8705  | 7.0749  |
| C  | 1.0983  | 5.8296  | 3.8520  |
| H  | 1.5703  | 6.2987  | 2.9999  |
| N  | -0.9944 | 4.5904  | 8.0890  |
| C  | -0.0377 | 6.3581  | 4.4342  |
| H  | -0.4922 | 7.2629  | 4.0509  |
| C  | -0.5974 | 5.6988  | 5.5118  |
| H  | -1.4928 | 6.0528  | 6.0013  |
| N  | -1.4275 | 3.7137  | 8.9376  |
| C  | -1.9017 | 4.1773  | 10.2303 |
| H  | -1.0492 | 4.2124  | 10.9106 |
| H  | -2.6560 | 3.4841  | 10.5934 |

|   |         |         |         |
|---|---------|---------|---------|
| H | -2.3195 | 5.1706  | 10.0960 |
| C | 0.0206  | 4.5480  | 5.9625  |
| N | 2.0403  | 2.8723  | 7.9038  |
| C | -0.6931 | 2.5203  | 7.2598  |
| C | -1.2796 | 2.4343  | 8.5148  |
| C | -2.4713 | 0.2838  | 8.7994  |
| H | -2.9329 | 0.4394  | 7.8320  |
| C | -2.7379 | -0.8647 | 9.5257  |
| H | -3.4228 | -1.6045 | 9.1300  |
| C | -2.1272 | -1.0681 | 10.7546 |
| H | -2.3366 | -1.9678 | 11.3206 |
| C | -1.2406 | -0.1254 | 11.2535 |
| H | -0.7458 | -0.2877 | 12.2032 |
| C | -0.9690 | 1.0260  | 10.5323 |
| H | -0.2413 | 1.7459  | 10.8961 |
| C | 2.0099  | 3.2034  | 9.0153  |
| C | -1.5955 | 1.2393  | 9.3066  |

2c (LS)

|          |            |                             |         |
|----------|------------|-----------------------------|---------|
| E (Eh) = | -3818.7789 | $\nu$ (cm <sup>-1</sup> ) = | 18.04   |
| Atom     | x          | y                           | z       |
| Fe       | 6.0407     | 2.2056                      | 6.0103  |
| C        | 5.6824     | 4.6262                      | 7.6223  |
| N        | 5.1382     | 3.9724                      | 6.5912  |
| S        | 3.8449     | 1.2837                      | 5.8853  |
| B        | 6.3176     | 0.5847                      | 10.4094 |
| H        | 5.2277     | 0.3759                      | 10.8949 |
| H        | 6.9447     | 1.3899                      | 11.0817 |
| H        | 6.9486     | -0.4507                     | 10.2688 |
| N        | 3.4399     | 3.8116                      | 4.9629  |
| C        | 5.1773     | 5.8130                      | 8.1153  |
| C        | 3.4626     | 5.6815                      | 6.4752  |
| N        | 2.5552     | 3.6388                      | 3.1068  |
| N        | 3.0017     | 4.5212                      | 3.9412  |
| C        | 4.0513     | 6.3565                      | 7.5272  |
| N        | 6.0594     | 1.6146                      | 7.8910  |
| C        | 4.0442     | 4.5015                      | 6.0523  |
| H        | 2.5734     | 6.0468                      | 5.9828  |
| C        | 1.4961     | 0.2034                      | 3.3308  |
| C        | 1.7719     | -1.1653                     | 1.3758  |

|   |         |         |         |
|---|---------|---------|---------|
| C | 1.2090  | -0.9537 | 2.6260  |
| H | 3.6294  | 1.6570  | 1.1336  |
| C | 2.6321  | -0.2220 | 0.8340  |
| H | 3.0898  | -0.3900 | -0.1332 |
| H | 1.5458  | -2.0714 | 0.8265  |
| C | 2.9238  | 0.9372  | 1.5343  |
| H | 0.5452  | -1.6936 | 3.0558  |
| C | 6.1318  | 1.1976  | 8.9632  |
| H | 1.0706  | 0.3657  | 4.3136  |
| H | 2.9285  | 4.1395  | 1.1305  |
| H | 1.3302  | 3.3922  | 1.4501  |
| H | 1.6490  | 5.0829  | 1.9413  |
| H | 3.6265  | 7.2852  | 7.8863  |
| C | 2.3460  | 1.1596  | 2.7817  |
| H | 5.6702  | 6.2940  | 8.9487  |
| C | 2.6859  | 2.3631  | 3.5499  |
| H | 6.5667  | 4.1741  | 8.0466  |
| C | 3.2845  | 2.4606  | 4.7978  |
| C | 2.0779  | 4.0938  | 1.8105  |
| C | 6.3986  | -0.2151 | 4.3984  |
| N | 6.9431  | 0.4388  | 5.4293  |
| S | 8.2360  | 3.1278  | 6.1357  |
| B | 5.7675  | 3.8223  | 1.6093  |
| H | 6.8583  | 4.0352  | 1.1275  |
| H | 5.1460  | 3.0142  | 0.9354  |
| H | 5.1319  | 4.8552  | 1.7470  |
| N | 8.6422  | 0.5996  | 7.0569  |
| C | 6.9039  | -1.4016 | 3.9049  |
| C | 8.6195  | -1.2698 | 5.5440  |
| N | 9.5278  | 0.7720  | 8.9126  |
| N | 9.0814  | -0.1102 | 8.0779  |
| C | 8.0304  | -1.9447 | 4.4922  |
| N | 6.0221  | 2.7966  | 4.1297  |
| C | 8.0376  | -0.0900 | 5.9675  |
| H | 9.5090  | -1.6349 | 6.0358  |
| C | 10.5847 | 4.2082  | 8.6901  |
| C | 10.3086 | 5.5757  | 10.6460 |
| C | 10.8713 | 5.3651  | 9.3955  |
| H | 8.4531  | 2.7519  | 10.8872 |
| C | 9.4493  | 4.6314  | 11.1875 |



|   |         |         |         |
|---|---------|---------|---------|
| H | 8.9918  | 4.7985  | 12.1550 |
| H | 10.5343 | 6.4816  | 11.1957 |
| C | 9.1581  | 3.4724  | 10.4867 |
| H | 11.5343 | 6.1058  | 8.9659  |
| C | 5.9510  | 3.2115  | 3.0567  |
| H | 11.0099 | 4.0469  | 7.7071  |
| H | 9.1552  | 0.2698  | 10.8886 |
| H | 10.7528 | 1.0187  | 10.5692 |
| H | 10.4354 | -0.6720 | 10.0771 |
| H | 8.4554  | -2.8731 | 4.1326  |
| C | 9.7356  | 3.2512  | 9.2389  |
| H | 6.4107  | -1.8825 | 3.0716  |
| C | 9.3963  | 2.0478  | 8.4702  |
| H | 5.5138  | 0.2367  | 3.9747  |
| C | 8.7972  | 1.9507  | 7.2224  |
| C | 10.0057 | 0.3167  | 10.2085 |

3a (LS)

|          |            |                             |         |
|----------|------------|-----------------------------|---------|
| E (Eh) = | -4158.4380 | $\nu$ (cm <sup>-1</sup> ) = | 5.42    |
| Atom     | x          | y                           | z       |
| S        | 6.4358     | 5.8381                      | 6.5139  |
| Fe       | 10.1529    | 3.8564                      | 8.6763  |
| N        | 9.2927     | 4.6097                      | 10.3729 |
| C        | 9.1400     | 5.9180                      | 10.5834 |
| H        | 9.5162     | 6.5720                      | 9.8085  |
| N        | 8.7211     | 4.7160                      | 7.6459  |
| C        | 8.5229     | 6.4315                      | 11.7065 |
| H        | 8.4233     | 7.5020                      | 11.8216 |
| S        | 8.8431     | 2.0020                      | 9.2019  |
| C        | 8.9333     | 2.2912                      | 10.9739 |
| H        | 9.9201     | 1.9327                      | 11.2680 |
| H        | 8.1740     | 1.7054                      | 11.4905 |
| C        | 8.7978     | 3.7539                      | 11.2765 |
| C        | 8.0297     | 5.5502                      | 12.6523 |
| H        | 7.5353     | 5.9144                      | 13.5444 |
| C        | 8.1623     | 4.1928                      | 12.4274 |
| H        | 7.7689     | 3.4671                      | 13.1274 |
| C        | 7.1036     | 2.4065                      | 8.8653  |
| H        | 6.9516     | 3.4681                      | 9.0497  |
| H        | 6.9939     | 2.2539                      | 7.7912  |

|   |         |         |         |
|---|---------|---------|---------|
| C | 7.7680  | 5.1947  | 7.1663  |
| C | 5.9963  | 0.2056  | 9.4126  |
| H | 6.5652  | -0.2596 | 8.6149  |
| C | 6.1489  | 1.5664  | 9.6621  |
| C | 5.4113  | 2.1479  | 10.6870 |
| H | 5.5143  | 3.2106  | 10.8790 |
| C | 5.1284  | -0.5570 | 10.1757 |
| H | 5.0161  | -1.6144 | 9.9690  |
| C | 4.5419  | 1.3858  | 11.4538 |
| H | 3.9715  | 1.8550  | 12.2465 |
| C | 4.4009  | 0.0311  | 11.2016 |
| H | 3.7239  | -0.5672 | 11.7989 |
| S | 13.8648 | 1.8711  | 10.8447 |
| N | 11.0132 | 3.1030  | 6.9798  |
| C | 11.1660 | 1.7947  | 6.7693  |
| H | 10.7897 | 1.1407  | 7.5441  |
| N | 11.5842 | 2.9967  | 9.7069  |
| C | 11.7834 | 1.2813  | 5.6464  |
| H | 11.8831 | 0.2109  | 5.5313  |
| S | 11.4631 | 5.7107  | 8.1509  |
| C | 11.3726 | 5.4215  | 6.3790  |
| H | 10.3855 | 5.7799  | 6.0855  |
| H | 12.1315 | 6.0076  | 5.8621  |
| C | 11.5082 | 3.9589  | 6.0764  |
| C | 12.2769 | 2.1626  | 4.7007  |
| H | 12.7715 | 1.7985  | 3.8088  |
| C | 12.1440 | 3.5201  | 4.9256  |
| H | 12.5376 | 4.2459  | 4.2257  |
| C | 13.2022 | 5.3048  | 8.4879  |
| H | 13.3532 | 4.2430  | 8.3040  |
| H | 13.3117 | 5.4578  | 9.5620  |
| C | 12.5354 | 2.5168  | 10.1889 |
| C | 14.3138 | 7.5039  | 7.9419  |
| H | 13.7467 | 7.9695  | 8.7406  |
| C | 14.1579 | 6.1437  | 7.6911  |
| C | 14.8935 | 5.5617  | 6.6649  |
| H | 14.7879 | 4.4994  | 6.4719  |
| C | 15.1828 | 8.2654  | 7.1789  |
| H | 15.2976 | 9.3223  | 7.3866  |
| C | 15.7639 | 6.3226  | 5.8982  |

|   |         |        |        |
|---|---------|--------|--------|
| H | 16.3325 | 5.8531 | 5.1045 |
| C | 15.9080 | 7.6768 | 6.1518 |
| H | 16.5859 | 8.2742 | 5.5545 |

3b (LS)

|          |            |                             |         |
|----------|------------|-----------------------------|---------|
| E (Eh) = | -8165.2646 | $\nu$ (cm <sup>-1</sup> ) = | 8.20    |
| Atom     | x          | y                           | z       |
| Se       | 6.6809     | 6.1442                      | 6.1655  |
| Fe       | 10.1644    | 3.9292                      | 8.7844  |
| N        | 9.4075     | 4.6843                      | 10.5278 |
| C        | 9.3370     | 5.9940                      | 10.7733 |
| H        | 9.6964     | 6.6457                      | 9.9884  |
| N        | 8.7299     | 4.8188                      | 7.8023  |
| C        | 8.8238     | 6.5127                      | 11.9448 |
| H        | 8.7902     | 7.5840                      | 12.0874 |
| S        | 8.8433     | 2.1137                      | 9.3402  |
| C        | 8.9636     | 2.3693                      | 11.1148 |
| H        | 9.9191     | 1.9341                      | 11.4114 |
| H        | 8.1655     | 1.8277                      | 11.6225 |
| C        | 8.9274     | 3.8337                      | 11.4451 |
| C        | 8.3500     | 5.6363                      | 12.9050 |
| H        | 7.9383     | 6.0045                      | 13.8365 |
| C        | 8.3949     | 4.2796                      | 12.6446 |
| H        | 8.0165     | 3.5596                      | 13.3586 |
| C        | 7.1105     | 2.5547                      | 9.0371  |
| H        | 6.9424     | 3.5706                      | 9.3921  |
| H        | 7.0277     | 2.5855                      | 7.9503  |
| C        | 7.9110     | 5.3461                      | 7.1638  |
| C        | 6.0221     | 0.2918                      | 9.1165  |
| H        | 6.6158     | 0.0077                      | 8.2544  |
| C        | 6.1534     | 1.5726                      | 9.6459  |
| C        | 5.3884     | 1.9236                      | 10.7520 |
| H        | 5.4736     | 2.9231                      | 11.1658 |
| C        | 5.1430     | -0.6169                     | 9.6780  |
| H        | 5.0486     | -1.6077                     | 9.2505  |
| C        | 4.5054     | 1.0137                      | 11.3174 |
| H        | 3.9092     | 1.3026                      | 12.1746 |
| C        | 4.3810     | -0.2575                     | 10.7818 |
| H        | 3.6886     | -0.9669                     | 11.2182 |
| Se       | 13.6074    | 1.6827                      | 11.4290 |

|   |         |        |         |
|---|---------|--------|---------|
| N | 10.9103 | 3.1698 | 7.0357  |
| C | 10.9941 | 1.8598 | 6.7951  |
| H | 10.6645 | 1.2069 | 7.5919  |
| N | 11.5918 | 3.0376 | 9.7748  |
| C | 11.4856 | 1.3431 | 5.6134  |
| H | 11.5313 | 0.2716 | 5.4750  |
| S | 11.5048 | 5.7436 | 8.2027  |
| C | 11.3150 | 5.4859 | 6.4337  |
| H | 10.3424 | 5.9089 | 6.1796  |
| H | 12.0847 | 6.0350 | 5.8929  |
| C | 11.3572 | 4.0224 | 6.1039  |
| C | 11.9232 | 2.2216 | 4.6379  |
| H | 12.3174 | 1.8548 | 3.6983  |
| C | 11.8667 | 3.5786 | 4.8936  |
| H | 12.2216 | 4.3010 | 4.1700  |
| C | 13.2395 | 5.2583 | 8.4445  |
| H | 13.3324 | 4.1934 | 8.2395  |
| H | 13.4100 | 5.3924 | 9.5132  |
| C | 12.3980 | 2.4984 | 10.4198 |
| C | 14.4200 | 7.4146 | 7.8824  |
| H | 13.9249 | 7.8841 | 8.7254  |
| C | 14.1853 | 6.0701 | 7.6093  |
| C | 14.8261 | 5.4829 | 6.5244  |
| H | 14.6543 | 4.4333 | 6.3094  |
| C | 15.2747 | 8.1559 | 7.0846  |
| H | 15.4513 | 9.2008 | 7.3096  |
| C | 15.6830 | 6.2236 | 5.7232  |
| H | 16.1786 | 5.7508 | 4.8840  |
| C | 15.9073 | 7.5621 | 6.0008  |
| H | 16.5747 | 8.1439 | 5.3771  |

#### 4. References.

- [S1] M. G. B. Drew, C. J. Harding, V. McKee, G. G. Morgan and J. Nelson, *J. Chem. Soc., Chem. Commun.*, 1995, 1035-1038.
- [S2] F. Anthony Deeney, C. J. Harding, G. G. Morgan, V. McKee, J. Nelson, S. J. Teat and W. Clegg, *J. Chem. Soc., Dalton Trans.*, 1998, 1837-1844.
- [S3] D. Plaza-Lozano, A. Conde-Gallardo and J. Olgún, *Eur. J. Inorg. Chem.*, 2021, **2021**, 2846-2856.

- [S4] A. Arroyave, A. Lennartson, A. Dragulescu-Andrasi, K. S. Pedersen, S. Piligkos, S. A. Stoian, S. M. Greer, C. Pak, O. Hietsoi, H. Phan, S. Hill, C. J. McKenzie and M. Shatruk, *Inorg. Chem.*, 2016, **55**, 5904-5913.
- [S5] A. Lennartson, A. D. Bond, S. Piligkos and C. J. McKenzie, *Angew. Chem.*, 2012, **124**, 11211-11214.
